1 Patterns of microbial colonization of human bone from surface-decomposed remains

2

3 Alexandra L. Emmons<sup>1</sup>, Amy Z. Mundorff<sup>1</sup>, Sarah W. Keenan<sup>2</sup>, Jonathan Davoren<sup>3</sup>, Janna Andronowski<sup>1</sup>,  
4 David O. Carter<sup>4</sup>, Jennifer M. DeBruyn<sup>5\*</sup>

5

6 <sup>1</sup> University of Tennessee, Department of Anthropology, 1621 Cumberland Avenue, 502A Strong Hall,  
7 Knoxville, TN 37996

8 <sup>2</sup> South Dakota School of Mines and Technology, Department of Geology and Geological Engineering,  
9 501 E. St. Joseph Street, Rapid City, SD 57701

10 <sup>3</sup> Bode Cellmark Forensics, 10430 Furnace Road, Suite 107, Lorton, Virginia 22079

11 <sup>4</sup> Laboratory of Forensic Taphonomy, Forensic Sciences Unit, Division of Natural Sciences and  
12 Mathematics, Chaminade University of Honolulu, 3140 Waiialae Avenue, Honolulu, Hawaii 96816

13 <sup>5</sup> University of Tennessee, Department of Biosystems Engineering and Soil Science, 2506 E.J. Chapman  
14 Drive, Knoxville, TN 37996

15

16

17 \* Corresponding author

18 E-mail: [jdebruyn@utk.edu](mailto:jdebruyn@utk.edu)

19

20

21

22

23

24

25

26

27

28

29

30

31

32

33

34

35

36

37

38

39

40

41

42

43

44

## 45 Abstract

46 Microbial colonization of bone is an important mechanism of post-mortem skeletal degradation.  
47 However, the types and distributions of bone and tooth colonizing microbes are not well characterized. It  
48 is unknown if microbial communities vary in abundance or composition between bone element types,  
49 which could help explain patterns of human DNA preservation. The goals of the present study were to (1)  
50 identify the types of microbes capable of colonizing different human bone types and (2) relate microbial  
51 abundances, diversity, and community composition to bone type and human DNA preservation. DNA  
52 extracts from 165 bone and tooth samples from three skeletonized individuals were assessed for bacterial  
53 loading and microbial community composition and structure. Random forest models were applied to  
54 predict operational taxonomic units (OTUs) associated with human DNA concentration. Dominant  
55 bacterial bone colonizers were from the phyla Proteobacteria (36%), Actinobacteria (23%), Firmicutes  
56 (13%), Bacteroidetes (12%), and Planctomycetes (4.4%). Eukaryotic bone colonizers were from  
57 Ascomycota (40%), Apicomplexa (21%), Annelida (19%), Basidiomycota (17%), and Ciliophora (14%).  
58 Bacterial loading was not a significant predictor of human DNA concentration in two out of three  
59 individuals. Random forest models were minimally successful in identifying microbes related to patterns  
60 of DNA preservation, complicated by high variability in community structure between individuals and  
61 body regions. This work expands on our understanding of the types of microbes capable of colonizing  
62 human bone and contributing to human skeletal DNA degradation.

63

64 **Keywords: human decomposition, DNA degradation, microbial ecology, necrobiome, bone**

65

## 66 Introduction

67 Skeletonization is the final stage of human decomposition, exposing bone to the surrounding  
68 environment [1]. Once the body has progressed to a skeletonized state, teeth and bone become the only  
69 materials that can be used for DNA identification. However, while bone is more recalcitrant than soft  
70 tissue, it is not stable; it continues to decay over time. With death, bone undergoes decomposition and  
71 diagenesis, the postmortem alteration of bone by chemical, physical, and biological factors that result in  
72 modification of the original bone material [2]. Time alone is not a good indicator of skeletal DNA  
73 preservation [3]. Instead, bone diagenesis and DNA survival is highly dependent on the depositional  
74 environment, including microbial activity [4,5], just as the decomposition of all organic resources are  
75 influenced by the decomposer community and physicochemical environment [6].

76 Bone decay mechanistically proceeds via chemical and/or microbial degradation of the organic  
77 and inorganic components of bone [7]. Microbes are capable of colonizing and degrading human bone,  
78 and microbial DNA is often co-extracted with human DNA, which interferes with downstream processes  
79 [8–10]. The organic component of bone consists of 90-95% type I collagen (primarily made up of glycine,  
80 proline, and hydroxyproline), with minor contributions from other non-collagenous proteins (e.g.,  
81 osteocalcin, osteoponin, and osteonectin) as well as lipids, mucopolysaccharides, and carbohydrates [11].  
82 The inorganic or mineral component is most similar to hydroxyapatite and consists of calcium, phosphate,  
83 carbonate, and to varying degrees sodium [2,12,13]. Bone apatite, or bioapatite, can be described as  
84 ‘nature’s trashcan,’ as infiltration and substitutions for environmental elements are common [2]. One of  
85 the main requirements for lasting preservation via fossilization is a complete shift from bioapatite

86 composition to a more stable mineral phase, such as fluorinated apatite or fluorine- and carbonate-  
87 enriched apatite [2,14].

88 When not in equilibrium with the surrounding environment, dissolution and recrystallization of  
89 bioapatite occurs, allowing microorganisms and enzymes access to the organic phase, resulting in  
90 degradation. Similarly, if the organic component degrades by either chemical or biological means,  
91 bioapatite becomes more vulnerable to environmental fluctuations and dissolution of the lattice structure  
92 is more probable due to new voids in the crystal lattice [2,7,12,15–17]. For example, wet environments  
93 exhibit increased rates of DNA degradation because water allows for mineral dissolution and increased  
94 hydrolytic damage [18]. The interdependence between the mineral and organic phases of bone supports  
95 the idea that greater porosity increases the susceptibility of bone to environmental influences [19,20], both  
96 chemical and biological.

97 Though the reservoir for long-term DNA preservation in bone remains unclear, binding of DNA  
98 to bioapatite crystallites seems to be crucial for long-term DNA survival [15]; persistence within  
99 osteocytes or other remnant tissues (e.g., from the red bone marrow) may also be possible [21,22]. Gross  
100 bone preservation and weathering has been shown to be unrelated to DNA preservation or degradation in  
101 some cases [19], while in others, indices of gross preservation are better correlated [23,24]. Differences in  
102 DNA preservation and degradation by bone type have been observed, though patterns are not consistent  
103 between studies (e.g., [9,10,25–28]). Whether this has to do with differences in cortical and cancellous  
104 bone composition is debated. More porous elements are thought to have increased bacterial presence [15],  
105 but increased presence does not necessarily mean increased degradation, as certain microbial taxa may be  
106 better adapted to exploiting skeletal material than others.

107 In archaeology, microbial degradation of bone has been studied primarily through histological  
108 research, focusing on regions of microscopic focal destruction [24,29–32]. However, culture-based  
109 research has shown that collagenase-producing bacteria can use mammalian bone as a substrate (e.g.,  
110 *Alcaligenes pichaudii*, *Bacillus subtilis*, *Pseudomonas fluorescens*, *Clostridium histolyticum*) [33]. Others  
111 have shown greater DNA preservation from archaeological sites with bones lacking culturable  
112 collagenase producing bacteria [34]. These observations suggest that DNA preservation within a bone  
113 may be partially dependent on the amount and/or type of microbes colonizing bones. Genera including  
114 *Pseudomonas*, *Xanthomonas*, *Fusarium*, and *Trichonella* have been cultured from bones from diverse  
115 archaeological sites [34]. Experimental research has also shown macroscopic destruction phenomena  
116 consistent with fungal degraders, specifically the genus *Mucor* [35], while others have cultured genera  
117 from the phylum Ascomycota [34]. Research to date has primarily been limited to culture-based methods,  
118 and only a small subset of environmental microbes can be cultivated in the laboratory [36]. Only a few  
119 studies [37,38] have been conducted since the advent of high throughput sequencing technologies, which  
120 permit microbial characterization without cultivation. Thus, there is a gap in knowledge regarding the  
121 types of microbes capable of colonizing and degrading human bone.

122 The purpose of the current study was two-fold: (1) to identify the types of microbes capable of  
123 colonizing different human bone types using next generation sequencing, and (2) to relate microbial  
124 abundances, diversity, and community composition to bone type and patterns of human DNA  
125 preservation. We expected total bacterial gene abundances, as a proxy for overall bacterial presence or  
126 loading, to increase with decreasing human DNA quantity and quality. We also expected to see shifts in  
127 microbial populations with changes in bone morphological and microstructural properties (i.e., specific  
128 element type and cortical content).

129

## 130 Materials and Methods

131 In 2009, three male individuals were placed outside on the ground surface to decompose naturally  
132 at the Anthropology Research Facility (ARF) at the University of Tennessee, Knoxville (UTK) (S1  
133 Table). The individuals were donated to the University of Tennessee Forensic  
134 Anthropology Center for the W. M. Bass Donated Skeletal Collection. Because no living human subjects  
135 were involved in this research and no personally identifiable information was collected, the project was  
136 exempt from review by the University of Tennessee Institutional Review Board. The skeletons were  
137 mapped and recovered following complete skeletonization (13 to 23 months), and gently washed with a  
138 new toothbrush and tap water at the Forensic Anthropology Center (UTK). The same 55 bones and teeth  
139 from each individual (total n = 165), which represented all skeletal element types, were selected for  
140 sampling (Table 1, S2 Fig). Prior to sampling, the external surface of each bone was cleaned by  
141 mechanically removing 1 to 2 mm of the outer surface, followed by chemical cleaning via bleach,  
142 ethanol, and sterile water. Bones were sampled using a drill and masonry bit at slow speeds; DNA was  
143 extracted from sampled bone powder using a complete demineralization protocol [39]. Bone sampling  
144 and DNA extraction and analysis were previously described in detail in Mundorff and Davoren [28].  
145 Human DNA quality and quantity were examined to elucidate patterns of DNA preservation by bone type  
146 [28]. These remaining skeletal DNA extracts were used in the present study to assess microbial loading  
147 via qPCR and microbial community composition and structure using next generation sequencing of the  
148 16S rRNA and 18S rRNA genes.

149

150 **Table 1:** Number of bones sampled by body region for each of the three individuals

151

| Body Region  | Sample Quantity per Individual |
|--------------|--------------------------------|
| Skull        | 6                              |
| Teeth        | 7                              |
| Trunk        | 13                             |
| Leg          | 4                              |
| Arm          | 3                              |
| Hand         | 8                              |
| Foot         | 14                             |
| <b>Total</b> | <b>55</b>                      |

152

153

## 154 Microbial and human DNA quantification

155 As a proxy for total bacterial abundance and colonization of bone, qPCR was used to quantify  
156 16S rRNA gene abundances [40] using the Femto™ Bacterial DNA Quantification Kit (Zymo Research).  
157 Assays were conducted following manufacturer instructions using a BioRad CFX Connect™ Real-Time  
158 PCR Detection System. Samples were quantified in triplicate, while standards were quantified in  
159 duplicate, and a minimum of three no template controls were included in each 96-well plate. Data are  
160 presented as gene copy number per gram of bone powder (gene copies gbp<sup>-1</sup>). Human DNA was  
161 quantified using the Quantifiler™ kit from Life Technologies (Qf); methods and data are reported in [28].

162

## 163 Total DNA quantification

164 Total DNA was quantified using the Quant-iT™ PicoGreen™ dsDNA Assay Kit (Invitrogen™)  
165 using a 200 µL total volume on a 96 well microplate reader. Samples and standards were run in duplicate,  
166 with standards ranging from 0 µg mL<sup>-1</sup> to 1.0 µg mL<sup>-1</sup>. Total DNA concentrations are reported as  
167 nanograms per gram of bone powder (ng gbp<sup>-1</sup>).  
168

## 169 Percentage cortical content

170 Clinical CT scans of each element were acquired using a Siemens Biograph mCT 64 slice  
171 scanner. Scans involved helical acquisition using a 0.6 mm slice thickness, 500 mAs, 120 kV, and bone  
172 window with kernel B70s. Data were stored on compact discs and transferred to workstations with image  
173 processing software (OsiriX 5.6, Geneva, Switzerland). The DNA sampling site on each element was  
174 digitally measured using ImageJ (National Institutes of Health). A macro was created to detect and  
175 measure the areas of cortical and cancellous bone (mm) on each CT slice where the sampling site  
176 appeared. Measurements of cortical width and height and cancellous width and height were taken  
177 separately for each cortical and cancellous bone region for all bones. Average cortical and cancellous  
178 bone width and height measurements were then computed. Due to issues with scan quality, ten of the  
179 original 129 samples were removed from the analysis. Percentages of cortical and cancellous bone were  
180 computed from each DNA sampling site for all elements.

181 Mean percentages of cortical bone composition at each sampling site were divided into seven  
182 categories by skeletal element: (1) 80 to 100%, (2) 70 to 79%, (3) 60 to 69%, (4) 50 to 59%, (5) 40 to  
183 49%, (6) 30 to 39%, and (7) 20 to 29%. The first category consists of bones whose sampling sites did not  
184 contain any cancellous bone, including the humerus, radius, ulna, femur, and tibia. The second, third, and  
185 fourth categories contained only three elements with sampling sites that were composed of over 50%  
186 cortical bone. Percentage data were further averaged from each element type across all individuals. The  
187 majority of element types revealed consistent measurements between individuals, with standard  
188 deviations of 10% or less. Three element types (temporal, occipital, cervical vertebra) exhibited high  
189 variability between the three individuals in the relative amount of cortical and cancellous bone removed  
190 from the sampling sites.

191

## 192 Next generation sequencing analysis

193 Total DNA extracts from bone were sent to Hudson Alpha Institute of Biotechnology Genome  
194 Services Laboratory (Huntsville, AL) for sequencing of the V3-V4 region of the 16S rRNA gene and V4-  
195 V5 of the 18S rRNA gene using 300 PE chemistry on an Illumina MiSeq instrument. Library preparation  
196 was performed by Hudson Alpha according to Illumina protocols. Primers included S-D-Bact-0564-a-S-  
197 15 and S-D-Bact-0785-b-A-18 for the 16S rRNA gene [41] and 574f and 1132r for the 18S rRNA gene  
198 [42]. Raw sequence data is available at NCBI Sequence Read Archive, Accessions PRJNA540930 and  
199 TBD.

200 Adapters were removed by Hudson Alpha prior to data distribution. Read quality was assessed  
201 using fastqc (v. 0.11.7) and multiqc (v. 1.5). Primers were removed using cutadapt (v. 1.14) [43], and  
202 reads were quality trimmed using trimmomatic (parameters: LEADING:15 TRAILING:10  
203 SLIDINGWINDOW:4:20 MINLEN:15 ) (v. 0.36) [44]. Data were further trimmed, aligned, and  
204 classified using mothur (v. 1.39.5) according to the mothur SOP [45]. 16S rRNA and 18S rRNA  
205 sequences were aligned and classified into operational taxonomic units (OTUs) at 97% sequence identity,

206 using SILVA (v. 128). Statistical analyses and visualizations were conducted in R (v. 3.4.1) [46],  
207 primarily using phyloseq (v.1.20.0) [47] and dependencies. Mothur code, R code, and associated files,  
208 including metadata, can be found at <https://github.com/aemmons90/Surface-Bone-Microbe-Project>.

209 Samples with less than 5,000 reads were removed from analyses, and remaining samples were  
210 rarefied to even depth by the smallest library (16S rRNA min. library = 48,288 reads; 18S rRNA min.  
211 library = 5,368 reads) prior to alpha and beta diversity measurements including ordination methods and  
212 visualizations based on ordination methods (S1 and S2 Figs). Bray-Curtis dissimilarities were computed  
213 for all ordinations. Alpha diversity metrics including Inverse Simpson and observed richness were  
214 computed using a subsampling approach, in which richness and diversity metrics were computed for a  
215 total of 100 iterations, each scaled to even depth.

216

## 217 **Sequence quality analysis**

218 Two samples failed to sequence using 16S rRNA primers, while twenty samples failed to  
219 sequence using 18S rRNA primers. Fastqc and multiqc demonstrated high quality reads in the forward  
220 direction, with a drop in mean quality Phred scores in the reverse direction at an approximate base pair  
221 position of 200 (Phred Score < 25). Following cutadapt and trimmomatic, total 16S rRNA contigs were  
222 reduced by 46%. This was further reduced by an additional 14% following further processing in mothur,  
223 resulting in a total read loss of 60% (from 37,185,525 to 14,958,201 sequences). This left a total of  
224 14,958,201 sequences, of which 692,709 were unique.

225 18S rRNA sequences presented an additional challenge; using 300 PE chemistry, forward and  
226 reverse reads overlapped by ~59 base pairs (bp) (See [48]). Fastqc and multiqc showed a significant  
227 reduction in mean base quality in both forward and reverse reads. Forward reads showed a drop in mean  
228 quality scores at an approximate position of 250 bp (Phred scores < 25), the same drop in quality was  
229 observed in reverse reads at ~200 bp. As a consequence, trimming to remove low quality base pairs  
230 resulted in a dramatic loss of reads. Following cutadapt and trimmomatic, total 18S rRNA contigs were  
231 reduced by 46%, and after further processing in mothur, sequences were further reduced by 49%,  
232 resulting in a total read loss of 95% (from 30,253,173 sequences to 1,518,971). This left a total of  
233 1,518,971 sequences, of which 181,486 were unique. Due to poor read quality, individual A was removed  
234 from additional data analysis in phyloseq, resulting in a remaining 7,901 OTUs across 91 samples.  
235 Following the removal of samples with less than 5,000 reads, a total of 71 samples remained.

236

## 237 **Data analysis**

238 All data analyses, excluding random forests tests, were conducted in R (v.3.4.1). Two-factor  
239 analysis of variance tests (ANOVAs) were used to examine differences in log transformed human DNA  
240 concentrations by individual and body region (i.e., head, upper torso, arm, hand, lower torso, leg, foot).  
241 Assumptions such as normality and homogeneity of variance were tested using D'Agostino's normality  
242 test (package = fBasics v. 3042.89) [49] and Levene's test (package = car v. 3.0.2) [50], respectively.  
243 Regression analysis was then used to assess the relationship between human DNA concentrations from  
244 bone samples and hypothesized predictor variables (i.e., bacterial DNA gene abundances, total DNA  
245 concentrations, and percentage cortical content). Human DNA concentrations, bacterial gene abundances,  
246 and total DNA concentrations were log-transformed prior to linear regression. Multiple regression  
247 analysis was also performed, treating log transformed human DNA as the dependent variable and log  
248 transformed bacterial gene abundances, log transformed total DNA, and percentage cortical content as

249 independent variables, including their various interactions. Assumptions including heteroskedasticity,  
250 normality, autocorrelation, and multicollinearity were tested using the R package sjstats (v. 0.17.0) [51].

251 Kruskal-Wallis tests were used to assess statistical significance in alpha diversity metrics,  
252 followed by multiple comparisons with false discovery rate (FDR) adjusted p-values. Permutational  
253 multivariate analysis of variance tests (PERMANOVAs), applying 999 permutations, were used to assess  
254 statistical significance in beta diversity between categorical variables of interest including body region,  
255 individual (A, B, and C), human DNA category, and cortical category. These same variables were tested  
256 for homogeneity of multivariate dispersion, using 999 permutations. Human DNA category was an  
257 arbitrary categorical variable created by dividing a continuous variable, human DNA concentration, by  
258 quartiles in each dataset, each quartile defining a category used for factor analysis. Cortical category was  
259 established by using the mean percentiles of cortical bone composition at each sampling site as described  
260 above [0 (teeth), 1 (80 to 100%), 2 (70 to 79%), 3 (50 to 59%), 4 (40 to 49%), 5 (30 to 39%), 6 (<39%)].  
261 However, because no bones comprised the 60-69% category, this category was eliminated for the purpose  
262 of data analysis. In addition, the frontal bone was assigned to the third category rather than the fourth, due  
263 to the mean being affected by a single individual. SIMPER, similarity percentages, followed by non-  
264 parametric Kruskal-Wallis tests with FDR corrected p-values, were used to determine OTUs significantly  
265 contributing to differences between individuals and human DNA category (seq-scripts release v. 1.0) [52].  
266 Random forest models were generated using Python (v. 3.5.2) and scikit-learn (v. 0.19.2) [53] to identify  
267 OTUs contributing to human DNA preservation patterns. OTUs were merged at the genus level, and all  
268 samples were used to generate the model (bacteria, n = 162; microbial eukaryotes, n = 71; combined  
269 datasets, n = 71). Data were randomly split into training (3/4) and testing (1/4) sets.

270

## 271 Results

### 272 Bacterial and human quantification via qPCR

273 Though bacterial gene abundances, which were used as a proxy for bacterial loading, were often  
274 high when human DNA quantities were low, for example in the teeth, upper torso, lower torso, and in the  
275 hand, this relationship was not consistent across all body regions. Despite foot bones having some of the  
276 highest human DNA quantities, these also corresponded with high bacterial gene abundances (Fig 1).  
277 While bones with high cortical content generally demonstrated lower bacterial infiltration, bacterial gene  
278 abundance was not a significant predictor of percent cortical content (adjusted  $R^2 = -0.03$ ) (Fig 2A). Total  
279 DNA was, however, a significant predictor of percent cortical content ( $p < 0.001$ ,  $F = 71.43$ ,  $DF = 1, 33$ ,  
280 adjusted  $R^2 = 0.67$ ); as the percentage of cortical bone decreased, total DNA increased (Fig 2A).

281

282 **Fig 1. Mean total DNA (Total (ng gbp<sup>-1</sup>)) or the concentration of DNA extracted, mean human DNA**  
283 **concentration (Human (ng gbp<sup>-1</sup>), as quantified using qPCR, and bacterial gene copies (16S rRNA**  
284 **copies gbp<sup>-1</sup>), quantified using qPCR by bone type (n = 3 individuals). Concentrations are presented as**  
285 **nanograms (ng) per gram of bone powder (gbp<sup>-1</sup>). Bars represent standard deviations where n = 3.**

286

287 **Fig 2. (A) Percent cortical content compared with log-normalized bacterial gene abundances and**  
288 **log-normalized total DNA, averaged by bone type (n = 3). (B) Bacterial gene abundances, percent**  
289 **cortical content, and total DNA compared with human DNA concentrations by individual (A, B, C).**  
290 Raw data is shown. The red line demonstrates the best fit linear regression.

291

292 When excluding teeth, human DNA quantities were significantly different by individual ( $p <$   
293  $0.001$ ,  $F = 12.06$ ,  $DF = 2$ ) and body region ( $DF = 6$ ,  $p < 0.01$ ,  $F = 4.52$ ), with a significant interaction  
294 between body region and individual ( $p < 0.05$ ,  $F = 1.87$ ,  $DF = 12$ ). On average, individual B had greater  
295 concentrations of human DNA than C or A, with individual A having the lowest concentrations.  
296 Therefore, to test the effects of various predictor variables on human DNA recovered from bone,  
297 individuals were assessed independently. Bacterial gene abundance did not significantly predict human  
298 DNA concentration in two out of three individuals (A,  $p = 0.12$ ; B,  $p = 0.05$ ), while bacterial gene  
299 abundance demonstrated a positive relationship with human DNA concentration in individual C ( $p = 0.01$ ,  
300  $F = 6.85$ , adjusted  $R^2 = 0.113$ ) (Fig 2B). A similar relationship was observed for total DNA, which  
301 showed a positive relationship with human DNA concentration for individual C ( $p = 0.001$ ,  $F = 12.41$ ,  
302 adjusted  $R^2 = 0.199$ ). In addition, percent cortical content was a significant predictor of human DNA  
303 concentration in two of three individuals (B,  $p = 0.003$ ,  $F = 10.33$ ,  $DF = 1, 41$ , adjusted  $R^2 = 0.182$ ; C,  $p =$   
304  $0.002$ ,  $F = 11.75$ ,  $DF = 1, 37$ , adjusted  $R^2 = 0.221$ ).

305 When including all predictors (i.e., bacterial gene abundance, total DNA concentration, and  
306 percent cortical content) in a single model, the assumption of multicollinearity was not met, indicating  
307 that predictor variables were highly correlated.  
308

### 309 Bacterial community analysis

310 Bacterial communities showed contributions from 47 phyla; of these, only 12 demonstrated  
311 greater than 2% relative abundance when averaged by bone type: Proteobacteria (20 to 57%),  
312 Actinobacteria (4 to 37%), Firmicutes (2 to 35%), Bacteroidetes (2 to 21%), Planctomycetes (0.2 to 11%),  
313 Saccharibacteria (0.2 to 12%), Chloroflexi (2.8 to 7.8%), Verrucomicrobia (0.05 to 4.7%), Chlamydiae  
314 (0.02 to 3.9%), Acidobacteria (0.04 to 2.2%), BRC-1 (0.009 to 2.3%), and Deinococcus-Thermus (0 to  
315 7.0%) (Fig 3).

316  
317 **Fig 3. Bacterial phylum-level community membership.** Mean relative abundances greater than 2% for  
318 all individuals combined. Bone phyla membership was averaged by bone type ( $n = 3$ ), except in the  
319 navicular, occipital, and sternum ( $n = 2$ ).

320  
321 Bacterial communities significantly differed by individual ( $p = 0.001$ ,  $F = 11.08$ ,  $DF = 2$ ) (Fig 4),  
322 body region ( $p = 0.001$ ,  $F = 3.99$ ,  $DF = 7$ ), human DNA concentration ( $p = 0.02$ ,  $DF = 3$ ,  $F = 1.48$ ), and  
323 cortical bone content ( $p = 0.003$ ,  $F = 1.28$ ,  $DF = 5$ ). There was a significant interaction between body  
324 region and individual ( $p = 0.001$ ,  $F = 2.70$ ,  $DF = 14$ ) and body region and cortical content ( $p = 0.02$ ,  $F =$   
325  $1.23$ ,  $DF = 4$ ) (Fig 5). Heterogeneous multivariate dispersion was observed by individual ( $p = 0.016$ ),  
326 body region ( $p = 0.001$ ), and cortical category ( $p = 0.001$ ), but not human DNA ( $p = 0.27$ ); bacterial  
327 communities from individual A and C clustered more tightly compared with individual B (Fig 4). When  
328 examining individuals independently, body region remained significant (A,  $p = 0.001$ ; B,  $p = 0.001$ ; C,  $p =$   
329  $0.001$ ), while cortical content remained significant in individuals B and C (B,  $p = 0.003$ ; C,  $p = 0.03$ )  
330 but not A ( $p = 0.63$ ).

331  
332 **Fig 4. Non-metric multidimensional scaling (NMDS) ordination performed on Bray-Curtis**  
333 **dissimilarities of bone bacterial communities ( $n = 162$ ) and visualized by individual.** Stress = 0.14 and  
334  $k = 3$ ; ellipses represent 95% confidence intervals.



335 **Fig 5. Non-metric multidimensional scaling (NMDS) ordinations on Bray-Curtis dissimilarities of**  
336 **bone bacterial communities.** Ordinations were conducted independently by individual (A: n = 53, B: n =  
337 55, C: n = 54) and visualized by body region (A: stress = 0.14, k = 3; B: stress = 0.10, k = 2; C: stress =  
338 0.10, k = 3). The letters “A”, “B”, and “C” above figure panels refer to individuals.

339

340 Diversity was significantly different by individual ( $p < 0.01$ , DF = 2); individual A had the lowest  
341 diversity (mean = 30.0), while individual C had the greatest diversity (mean = 46.9) (S3 Fig). When each  
342 individual was considered independently, diversity also significantly differed by body region (A:  $p <$   
343  $0.01$ ,  $X^2 = 19.0$ , DF = 7; B:  $p < 0.0001$ ,  $X^2 = 34.6$ , DF = 7); C:  $p < 0.001$ ,  $X^2 = 24.9$ , DF = 7) (S3 Table;  
344 S4 Fig). Body regions from A followed a different trend in diversity than B or C. Richness did not show  
345 significant differences by individual ( $p > 0.05$ ,  $X^2 = 3.97$ , DF = 2), but did significantly differ by body  
346 region ( $p < 0.0001$ ,  $X^2 = 46.0$ , DF = 7). Observed richness was greatest in the upper and lower torsos (S5  
347 Fig).

348 OTUs driving differences between individuals included predominantly soil taxa from the  
349 following families: Streptosporangiaceae, Nocardiaceae, Comamonadaceae, Pseudomonadaceae,  
350 Xanthomonadaceae, Clostridiaceae, Brevibacteriaceae, Streptomycetaceae, Intrasporangiaceae,  
351 unclassified Thermomicrobia, and Mycobacteriaceae. Notably, OTUs identified as *Simplicispira* and an  
352 unclassified member of Streptosporangiaceae were found at greater abundances in A, while  
353 *Stenotrophomonas* and *Rhodococcus* showed greater abundances in individual C. *Brevibacterium*, an  
354 unclassified member of Thermomicrobia, and *Pseudomonas* were greatest in B (S6 Fig). Although three  
355 OTUs significantly contributed to differences by human DNA category (two *Streptomyces* and one  
356 *Mycobacterium*), these OTUs did not remain significant after correcting p-values using FDR.

357 Random forest models were used to identify bacterial OTUs associated with differences in human  
358 DNA concentrations. The initial model generated had a mean absolute error of 91.7 ( $p = 0.03$ , adjusted  $R^2$   
359 = 0.09), with 30 predictor OTUs identified (S7 Fig). Important predictor OTUs were represented by  
360 Actinobacteria (importance = 30%), Bacteroidetes (17%), Firmicutes (23%), and Proteobacteria (30%).  
361 Contributing OTUs greater than 1% included the genera *Clostridium*, unclassified Dermacoccaceae,  
362 *Paracoccus*, and *Actinotalea* (S7A Fig). The model only slightly improved when excluding teeth from the  
363 analysis (mean absolute error = 72.5,  $p = 0.02$ , adjusted  $R^2 = 0.12$ ). When teeth were excluded, the top  
364 five predictor OTUs became unclassified Dermacoccaceae (14%), unclassified Desulfuromonadales (9%),  
365 *Clostridium* (3%), unclassified Gaiellales (3%), and unclassified Mollicutes (3%).

366

### 367 Microbial eukaryotic community analysis

368 Microbial eukaryotic communities showed large contributions from Ascomycota (mean relative  
369 abundance 40%), Apicomplexa (21%), Annelida (19%), Basidiomycota (17%), Ciliophora (14%), and  
370 enigmatic Eukaryota (including *Incertae sedis*) (14%), with additional contributions from Cercozoa (9%)  
371 Peronosporomycetes (8%), Nematoda (7%), and Cryptomycota (6%). Unclassified Eukaryota had a mean  
372 contribution of 8% (Fig 6). While Apicomplexa had a high mean relative abundance (21%), this was  
373 dominant in a single sample, a fibula from individual B.

374

375 **Fig 6. Relative abundance of eukaryotic phyla by bone type and individual.** Relative abundance is  
376 shown for only those phyla with greater than 1% relative abundance, and for two of the three individuals  
377 (B and C). Data were not averaged by bone type.

378

379 Eukaryotic communities showed similar patterns in beta diversity compared to bacterial  
380 communities. When testing differences between body region, individuals, human DNA quartiles, and  
381 cortical content, microbial eukaryotic communities significantly differed by individual ( $p = 0.001$ ,  $F =$   
382  $8.69$ ,  $DF = 1$ ), body region ( $p = 0.001$ ,  $F = 2.83$ ,  $DF = 7$ ), human DNA ( $p = 0.02$ ,  $F = 1.41$ ,  $DF = 3$ ), and  
383 cortical content ( $p = 0.001$ ,  $F = 1.60$ ,  $DF = 5$ ), with a significant interaction between body region and  
384 individual ( $p = 0.001$ ,  $F = 4.08$ ,  $DF = 3$ ), body region and human DNA ( $p = 0.02$ ,  $F = 1.25$ ,  $DF = 4$ ), and  
385 individual and cortical content ( $p = 0.008$ ,  $F = 1.72$ ,  $DF = 1$ ). Due to sequence loss, alpha diversity  
386 metrics were not computed.

387 A random forest model was also applied to the microbial eukaryotic dataset to identify OTUs  
388 contributing to patterns of human DNA preservation. The resulting model was not significant, with a  
389 mean absolute error of 171.96 ( $p = 0.14$ , adjusted  $R^2 = 0.07$ ). The most important predictor taxon  
390 identified (OTU0003), contributing to 33% of the model, was an unclassified Saccharomycetales.  
391 Eukaryotic and bacterial OTU data were combined and a random forest model was constructed for shared  
392 samples to predict human DNA concentrations. The resulting model was significant (mean absolute error  
393 = 175.71,  $p = 0.03$ , adjusted  $R^2 = 0.21$ ). Again, the top predictor taxon was OTU0003 with an importance  
394 value of 10% or 0.1; this Saccharomycetales OTU decreased in abundance in the skull of individual B as  
395 human DNA concentrations increased (S8 Fig). Other important contributors, with importance values  
396 greater than 1% or 0.01, included bacterial genera from the phyla Actinobacteria (*Microbacterium*, 6%,  
397 Gaiellales uncultured, 5%, *Leifsonia*, 2%, *Williamsia*, 2%), Proteobacteria (*Stenotrophomonas*, 2%),  
398 Firmicutes (Clostridiales Family XI uncultured, 2%), Gemmatimonadetes (unclassified  
399 Gemmatimonadaceae, 2%), and Planctomycetes (*Zavarzinella*, 2%).

400

## 401 Discussion

### 402 Characterizing the postmortem bone microbiome

403 The post-mortem bone microbiome is diverse and variable in the human skeleton two years after  
404 death. Excluding Planctomycetes and Saccharibacteria, dominant taxa observed in this study were also  
405 shown to dominate human rib samples from twelve individuals that had decomposed at the ARF [37]. Rib  
406 samples from the current study most closely resembled dry remains from Damann et al. [37] in phyla-  
407 level contributions, but also contained taxa proportions greater than 2% from Verrucomicrobia,  
408 Saccharibacteria, Planctomycetes, Chloroflexi, and Chlamydiae (S10 Fig). Discrepancies in observed taxa  
409 may be due to differences in sample size and sequencing analysis methodologies. Planctomycetes, a  
410 phylum commonly associated with aquatic environments, and Saccharibacteria, a phylum containing  
411 multiple environmental taxa have been observed in gravesoils [54,55].

412 Ascomycota, observed in 100% of samples (71 of 71) in the eukaryotic dataset, and  
413 Basidiomycota, observed in 55% of samples, were the dominant microbial eukaryotes. This was  
414 unsurprising, as these fungal phyla contain multiple saprophytic groups that have previously been  
415 observed in association with decomposing carrion [56]. In addition to fungi, multiple phyla of protists  
416 were also detected, including Apicomplexa (5 of 71 samples), Ciliophora (49 of 71 samples), and  
417 Cercozoa (49 of 71 samples). Protists found in association with bones may be opportunistic, potentially  
418 transferred to remains via soil, scavengers, insects, precipitation, and run-off, and may be active fungal  
419 and bacterial consumers. For example, the genus *Rhogostoma*, which was prevalent in samples from  
420 individuals A and B, is known to consume both fungal and bacterial species [57]. Similarly, Nematoda  
421 were detected, with the majority of sequences belonging to the family Rhabditidae, which contains

422 bacterivorous members, previously observed in decomposition research [58–61]. Other bacterivores  
423 detected within human bones included Tubulinea, Cercozoa, and Apicomplexa, which have also been  
424 found in soils underlying human remains [61]. Cercozoa and other testate amoeba are extremely sensitive  
425 to environmental change, and generally decrease in soil with cadaveric inputs [62]. While certain species  
426 have responded with positive growth during late stage decomposition (from 1 month to 1 year post-  
427 mortem) [63], their presence in bones over a year after death likely reflects a shift back to more  
428 oligotrophic conditions.

429 Presence of *Deinococcus-Thermus*, a phylum well-represented by thermophiles [64], at greater  
430 than 1% relative abundance in 6% of samples, is suggestive of a harsh environment. Bones deposited on  
431 the soil surface are exposed to daily and annual temperature contrasts. East Tennessee experiences  
432 freezing winter temperatures and temperatures greater than 37°C in the summer, which can influence  
433 moisture availability. As indicated by Reeb et al. [38], bone may provide shelter from harsh environments  
434 (i.e., variable temperature, UV). Individual C had greater abundances of *Deinococcus-Thermus* than B  
435 and A (S11 Fig), likely due to the greater duration of exposure to environmental fluctuations, including  
436 temperature and precipitation (S9 Fig). The majority of samples with abundances greater than 1% were  
437 from the skull including cranial elements and teeth. The cranium is often one of the first anatomical  
438 regions to skeletonize during decomposition due to low tissue biomass and high larval presence [65] and  
439 likely experiences greater intervals of environmental exposure.

440

#### 441 **Community differences by individual and anatomical region**

442 Beta diversity analyses showed differences in bone microbial communities, including both  
443 prokaryotes and eukaryotes, by individual and body region. This is unsurprising, as there is extensive  
444 research on the living human microbiome and the multitude of variables leading to differences in  
445 microbial community structure and composition between individuals including life history (e.g., health  
446 and diet) [66–68]. Two of the three individuals had a history of diabetes (individuals A and C), which  
447 may have contributed to differences in microbial community structure and composition [69]. Moreover,  
448 placement duration at the ARF and differences in temperature and precipitation likely contributed to  
449 differences observed between individuals. In particular, bacterial alpha diversity was lowest in individual  
450 A and greatest in C, reflecting differences in exposure duration (S3 and S9 Figs). The impact of soil  
451 microbiota is expected to increase overtime with prolonged soil contact [37]. Because of this, we  
452 hypothesize that differential rates in skeletonization likely influence bone microbial composition and  
453 structure at any given time point, which likely has implications for post-mortem interval estimation.

454 Recently, Pechal et al. [70] showed microbial differentiation by anatomic region (i.e., external  
455 sites from the auditory canal, eyes, nose, mouth, umbilicus, and rectum) up to 48 hours after death.  
456 Though they speculated that this pattern would likely attenuate with longer post-mortem intervals, this  
457 has yet to be tested. Here, bone microbial communities retained differences by anatomic location in  
458 individuals with post-mortem intervals greater than 1 year. Micro-environmental differences in soil  
459 communities as well as differences in enteric microorganisms and their abilities to compete and persist  
460 with soil microorganisms colonizing the body likely contributed to spatial differences observed in  
461 anatomic regions and between different individuals. Research on the human microbiome has shown  
462 microbial community uniqueness by individual as well as body site and time [71,72], and has recently  
463 gained utility in forensics [73,74].

464 Nicholson et al. [75] demonstrated that bones in similar environments showed drastic differences  
465 in bone preservation, despite similarities in soil pH and drainage. This evokes the question: if not the  
466 environment, then what is the source of these differences? Enteric/putrefactive bacteria have been posited  
467 as the primary source of microbial bone degradation in pig remains; neonatal pig remains demonstrated  
468 no evidence of microbial degradation, which researchers hypothesized as being related to the relative  
469 sterility of infant guts compared with adults [31]. While the source of bacteria in this study remains  
470 unknown, as we have no gut or soil samples prior to placement to track bacterial translocation, we suspect  
471 that both soil and gut microbes are able to colonize and aid in bone degradation (e.g.,[76]). We have  
472 previously demonstrated that human-associated *Bacteroides*, an obligate anaerobic member of the human  
473 gut microbiome, can persist for long time periods in soils impacted by decomposing human remains  
474 [54,59], providing evidence that these gut microbes are transferred to the environment and have the  
475 potential to colonize bone. The extent to which enteric microorganisms are able to move throughout the  
476 body post-mortem is likely limited, and distance from the gut may be a crucial factor controlling  
477 differences in microbial communities by body region. However, Pechal et al. [70] recently observed an  
478 increase in gene abundance associated with bacterial motility during decomposition, so this area of  
479 postmortem microbiology merits further study.

480 Bone microstructure (i.e., the percentage of cortical content) also influenced differences in  
481 microbial communities. Communities differed by cortical bone percentage likely due to the presence of  
482 greater void space in cancellous bone compared with cortical bone, facilitating ease of invasion,  
483 especially for incidental taxa or soil contaminants (e.g., potentially Verrucumicrobia). However, this may  
484 also be related to nutritive differences; cancellous elements may harbor more labile remnant material such  
485 as red marrow [22], while cortical bone may be considered more recalcitrant. This may account for  
486 patterns observed in total DNA concentrations and bacterial gene abundances. Bacterial gene abundance  
487 was not a significant predictor of human DNA concentration, and cases where bacterial gene abundance  
488 did significantly predict human DNA (i.e., individual C), the relationship was positive, indicating that the  
489 degree of microbial loading does not negatively impact the pattern of skeletal DNA preservation in  
490 remains with environmental exposure up to two years. Rather, the presence of specific taxa likely has a  
491 greater impact on skeletal integrity.

492 Additionally, presence of both aerobic and anaerobic genera points to the existence of micro-  
493 spatial differences within a single bone. This phenomenon is also observed in soils where anaerobic  
494 microsites can persist within a well-drained, well-aerated soil. Extracellular polymeric substances were  
495 observed surrounding living cells on bison bone at Yellowstone National Park [38]. This highlights the  
496 importance of biofilm production in microbial bone colonization. Though microscopy was not performed  
497 here to confirm biofilm presence, we hypothesize that biofilm production combined with increased  
498 microbial biomass during decomposition plays an important role in the development of micro-spatial  
499 differences in oxygen access and respiration strategies.

500

## 501 **Microbial taxa associated with skeletal DNA preservation**

502 Random forest models were minimally successful in identifying microbes related to DNA  
503 preservation patterns, however models were likely complicated by microbial community differences by  
504 individual and body region. While bacterial OTUs produced more accurate random forest models than  
505 eukaryotic OTUs, the best model resulted when combining both bacterial and eukaryotic data sets, with a  
506 Saccharomycetales OTU identified as the most important contributor to the model. Saccharomycetales,

507 commonly associated with the oral microbiome of healthy humans [77], decreased in abundance with  
508 increased human DNA concentrations in the cranium of individual B. Oral microbes may persist  
509 throughout decomposition and may be implicated in DNA survival.

510 Similarly, bacterial random forest models were conflated by body region; genera *Actinotalea* and  
511 *Paracoccus*, showed increased abundances with human DNA concentrations in teeth, while  
512 Dermacoccaceae demonstrated increased abundances in feet. Importantly, increased abundances of  
513 *Clostridium*, a genus that contains known collagenase producers [12], were associated with decreased  
514 human skeletal DNA concentrations. The foot is the farthest anatomical region from the gut, and  
515 interestingly, bones of the feet had some of the highest human DNA concentrations. If the *Clostridium*  
516 present in bones is primarily derived from the gut, then distance from the gut may be an important factor  
517 related to human DNA degradation. Though predictor taxa could be identified using random forest  
518 models, their functional role in DNA degradation, if any, remains unclear. The variation seen by body  
519 region and individual may be minimized by increasing the research sample size to include more  
520 individuals.

521

## 522 Conclusions

523 Most of what is known regarding the microbial degradation of bone is from histological research  
524 concerning archaeological bone (e.g., [32,34,78–80]). The current study used next generation sequencing  
525 technologies to provide a survey of bacteria, fungi, and protists potentially capable of bone colonization.  
526 Though specific taxa were correlated to patterns of human DNA preservation using random forest  
527 models, the functional role of identified bone microbes remains unknown. Because the target of this study  
528 was DNA, which provides information regarding presence rather than activity, it is difficult to discern  
529 incidental taxa, i.e. taxa that are present and inactive, from taxa that are actively degrading bone. This is a  
530 longstanding challenge in microbial ecology: linking structure and function. Remnant extracellular DNA  
531 of microbial origin is a problem [78], and microbial DNA can bind to hydroxyapatite similar to human  
532 DNA [79, 80], further complicating observed differences in community composition and structure.  
533 Nevertheless, the current study presents a first step in characterizing microbial community differences  
534 across bone types within and between individuals following skeletonization. Ultimately, this provides a  
535 foundation for understanding the postmortem colonization of bone by microbes and the subsequent  
536 effects on bone stability and human DNA preservation and may help guide targeted human DNA  
537 recovery.

538

## 539 Acknowledgements

540 Thanks to Mundorff and DeBruyn lab members for their support and guidance in this research. In  
541 addition, the authors would like to thank Dr. Yong Bradley for providing access to the clinical CT scanner  
542 at the University of Tennessee Medical Center, and to Shelley Acuff for operating the CT system and  
543 assisting with bone set-up prior to scanning.

544

## 545 Funding

546 This work was partially funded by National Institute of Justice award 2010-DN-BX-K229 to AZM, JD  
547 and JMD, and National Science Foundation award 1549726 to JMD. The opinions, findings, and  
548 conclusions herein are those of the authors alone and do not necessarily reflect those of the Department of  
549 Justice or the National Science Foundation.

550

## 551 References

- 552 1. Megyesi MS, Nawrocki SP, Haskell NH. Using accumulated degree-days to estimate the  
553 postmortem interval from decomposed human remains. *J Forensic Sci.* 2005;50: 618–626.  
554 doi:10.1520/JFS2004017
- 555 2. Keenan S. From bone to fossil : a review of the diagenesis of bioapatite. *Am Mineral.* 2016;  
556 doi:10.2138/am-2016-5737
- 557 3. Perry WL, Bass WM, Riggsby WS, Sirotkin K. The autodegradation of deoxyribonucleic acid  
558 (DNA) in human rib bone and its relationship to the time interval since death. *J Forensic Sci.*  
559 1988;33: 144–53. Available: <http://www.ncbi.nlm.nih.gov/pubmed/3351452>
- 560 4. Elsner J, Schibler J, Hofreiter M, Schlumbaum A. Burial condition is the most important factor for  
561 mtDNA PCR amplification success in Palaeolithic equid remains from the Alpine foreland.  
562 *Archaeol Anthropol Sci.* 2015;7: 505–515. doi:10.1007/s12520-014-0213-4
- 563 5. Burger J, Hummel S, Hermann B, Henke W. DNA preservation: a microsatellite-DNA study on  
564 ancient skeletal remains. *Electrophoresis.* Wiley Subscription Services, Inc., A Wiley Company;  
565 1999;20: 1722–8. doi:10.1002/(SICI)1522-2683(19990101)20:8<1722::AID-  
566 ELPS1722>3.0.CO;2-4
- 567 6. Swift MJ, Heal OW, Anderson JM. *Decomposition in Terrestrial Ecosystems.* University of  
568 California Press; 1979.
- 569 7. Collins MJ, Nielsen-Marsh CM, Hiller J, Smith CI, Roberts JP, Prigodich R V., et al. The survival  
570 of organic matter in bone: a review. *Archaeometry.* 2002;44: 383–394. doi:10.1111/1475-  
571 4754.t01-1-00071
- 572 8. Alonso a, Andelinović S, Martín P, Sutlović D, Erceg I, Huffine E, et al. DNA typing from  
573 skeletal remains: evaluation of multiplex and megaplex STR systems on DNA isolated from bone  
574 and teeth samples. *Croat Med J.* 2001;42: 260–266. doi:10.1016/j.seppur.2013.09.009
- 575 9. Leney MD. Sampling skeletal remains for ancient DNA (aDNA): A measure of success. *Hist*  
576 *Archaeol.* 2006;40: 31–49.
- 577 10. Milos A, Selmanović A, Smajlović L, Huel RLM, Katzmarzyk C, Rizvić A, et al. Success rates of  
578 nuclear short tandem repeat typing from different skeletal elements. *Croat Med J.* 2007;48: 486–  
579 493.
- 580 11. Olszta MJ, Cheng X, Jee SS, Kumar R, Kim Y-Y, Kaufman MJ, et al. Bone structure and  
581 formation: A new perspective. *Mater Sci Eng R.* 2007; doi:10.1016/j.mser.2007.05.001

- 582 12. Child AM. Microbial Taphonomy of Archaeological Bone [Internet]. Studies in Conservation.  
583 1995 Feb. doi:10.2307/1506608
- 584 13. Schultz M. Microscopic Structure of Bone. Forensic taphonomy: the postmortem fate of human  
585 remains. 1997. pp. 187–199.
- 586 14. Keenan SW, Summers AS. Early diagenesis and recrystallization of bone. *Geochim Cosmochim*  
587 *Acta*. 2017;196: 209–223. doi:10.1016/j.gca.2016.09.033
- 588 15. Gotherstrom A, Collins MJ, Angerbjorn A, Liden K. Bone preservation and DNA amplification.  
589 *Archaeometry*. 2002;3: 395–404. doi:10.1111/1475-4754.00072
- 590 16. Sosa C, Vispe E, Núñez C, Baeta M, Casalod Y, Bolea M, et al. Association between ancient bone  
591 preservation and dna yield: a multidisciplinary approach. *Am J Phys Anthropol*. 2013;151: 102–9.  
592 doi:10.1002/ajpa.22262
- 593 17. Campos PF, Craig OE, Turner-Walker G, Peacock E, Willerslev E, Gilbert MTP. DNA in ancient  
594 bone - Where is it located and how should we extract it? *Ann Anat*. Elsevier GmbH.; 2012;194: 7–  
595 16. doi:10.1016/j.aanat.2011.07.003
- 596 18. Graw M, Weisser HJ, Lutz S. DNA typing of human remains found in damp environments.  
597 *Forensic Sci Int*. 2000;113: 91–95. doi:10.1016/S0379-0738(00)00221-8
- 598 19. Misner LM, Halvorson AC, Dreier JL, Ubelaker DH, Foran DR. The correlation between skeletal  
599 weathering and dna quality and quantity. *J Forensic Sci*. 2009;54: 822–828. doi:10.1111/j.1556-  
600 4029.2009.01043.x
- 601 20. Gilbert MTP, Rudbeck L, Willerslev E, Hansen AJ, Smith C, Penkman KEH, et al. Biochemical  
602 and physical correlates of DNA contamination in archaeological human bones and teeth excavated  
603 at Matera, Italy. *J Archaeol Sci*. 2005;32: 785–793. doi:10.1016/j.jas.2004.12.008
- 604 21. Iwamura ESM, Oliveira CRGCM, Soares-Vieira JA, Nascimento SAB, Mu??oz DR. A Qualitative  
605 Study of Compact Bone Microstructure and Nuclear Short Tandem Repeat Obtained From Femur  
606 of Human Remains Found on the Ground and Exhumed 3 Years After Death. *Am J Forensic Med*  
607 *Pathol*. 2005;26: 33–44. doi:10.1097/01.paf.0000154116.30837.d5
- 608 22. Andronowski JM, Mundorff AZ, Pratt I V, Davoren JM, Cooper DML. Evaluating differential  
609 nuclear DNA yield rates and osteocyte numbers among human bone tissue types: A synchrotron  
610 radiation micro-CT approach. 2017;28: 211–218. doi:10.1016/j.fsigen.2017.03.002
- 611 23. Haynes S, Searle JB, Bretman A, Dobney KM†. Bone Preservation and Ancient DNA: The  
612 Application of Screening Methods for Predicting DNA Survival. *J Archaeol Sci*. 2002;29: 585–  
613 592. doi:10.1006/jasc.2001.0731
- 614 24. Jans MEME, Nielsen-marsh CMM, Smith CII, Collins MJJ, Kars H. Characterisation of  
615 microbial attack on archaeological bone. *J Archaeol Sci*. Academic Press; 2004;31: 87–95.  
616 doi:10.1016/j.jas.2003.07.007
- 617 25. Edson SM, Christensen AF, Barritt SM, Meehan A, Leney MD, Finelli LN. Sampling of the  
618 cranium for mitochondrial DNA analysis of human skeletal remains. *Forensic Sci Int Genet Suppl*

- 619 Ser. 2009;2: 269–270. doi:10.1016/j.fsigss.2009.09.029
- 620 26. Mundorff AZ, Bartelink EJ, Mar-Cash E. DNA preservation in skeletal elements from the world  
621 trade center disaster: Recommendations for Mass Fatality Management. *J Forensic Sci.* 2009;54:  
622 739–745. doi:10.1111/j.1556-4029.2009.01045.x
- 623 27. Hines D, Vennemeyer M, Amory S, Huel R, Hanson I, Katzmarzyk C, et al. Prioritized Sampling  
624 of Bone and Teeth for DNA Analysis in Commingled Cases. *Commingled Human Remains:  
625 Methods in Recovery, Analysis, and Identification.* Elsevier Inc; 2014. pp. 275–305.
- 626 28. Mundorff A, Davoren JM. Examination of DNA yield rates for different skeletal elements at  
627 increasing post mortem intervals. *Forensic Sci Int Genet.* 2014;8: 55–63.  
628 doi:10.1016/j.fsigen.2013.08.001
- 629 29. Jans MME, Kars H, Nielsen-Marsh CM, Smith CI, Nord AG, Arthur P, et al. IN SITU  
630 PRESERVATION OF ARCHAEOLOGICAL BONE: A HISTOLOGICAL STUDY WITHIN A  
631 MULTIDISCIPLINARY APPROACH. *Archaeometry.* 2002;44: 343–352.
- 632 30. Hackett CJ. *Microscopical Focal Destruction (Tunnels) in Exhumed Human Bones.* Med Sci Law.  
633 SAGE PublicationsSage UK: London, England; 1981;21: 243–265.  
634 doi:10.1177/002580248102100403
- 635 31. White L, Booth TJ. The origin of bacteria responsible for bioerosion to the internal bone  
636 microstructure: Results from experimentally-deposited pig carcasses. *Forensic Sci Int.* 2014;239:  
637 92–102. doi:10.1016/j.forsciint.2014.03.024
- 638 32. Booth TJ. An Investigation Into the Relationship Between Funerary Treatment and Bacterial  
639 Bioerosion in European Archaeological Human Bone. *Archaeometry.* 2016;58: 484–499.  
640 doi:10.1111/arcm.12190
- 641 33. Balzer A, Gleixner G, Grupe G, Schmidt H-L, Schramm S, Turban-Just S. In vitro decomposition  
642 of bone collagen by soil bacteria: the implications for stable isotope analysis in archaeometry.  
643 *Archaeometry.* 1997;39: 415–429. doi:10.1111/j.1475-4754.1997.tb00817.x
- 644 34. Child AMM. *Towards an Understanding of the Microbial Decomposition of Archaeological Bone  
645 in the Burial Environment.* J Archaeol Sci. Academic Press; 1995;22: 165–174.  
646 doi:10.1006/JASC.1995.0018
- 647 35. Marchiafava V, Bonucci E, Ascenzi A. Fungal Osteoclasia: a Model of Dead Bone Resorption.  
648 *Calcif Tissue Res.* Springer-Verlag; 1974;14: 195–210. Available: [https://link-springer-  
649 com.proxy.lib.utk.edu/content/pdf/10.1007%2F978-3-642-00602-9\\_10.pdf](https://link-springer-com.proxy.lib.utk.edu/content/pdf/10.1007%2F978-3-642-00602-9_10.pdf)
- 650 36. Staley JT, Konopka A. MEASUREMENT OF IN SITU ACTIVITIES OF  
651 NONPHOTOSYNTHETIC MICROORGANISMS IN AQUATIC AND TERRESTRIAL  
652 HABITATS. *Annu Rev Microbiol.* 1985;39: 321–346. Available: [www.annualreviews.org](http://www.annualreviews.org)
- 653 37. Damann FE, Williams DE, Layton AC. Potential Use of Bacterial Community Succession in  
654 Decaying Human Bone for Estimating Postmortem Interval. *J Forensic Sci.* 2015;60: 844–850.  
655 doi:10.1111/1556-4029.12744



- 656 38. Reeb V, Kolel A, McDermott TR, Bhattacharya D. Good to the bone: Microbial community  
657 thrives within bone cavities of a bison carcass at Yellowstone National Park. *Environ Microbiol.*  
658 2011;13: 2403–2415. doi:10.1111/j.1462-2920.2010.02359.x
- 659 39. Amory S, Huel R, Bilić A, Loreille O, Parsons TJ. Automatable full demineralization DNA  
660 extraction procedure from degraded skeletal remains. *Forensic Sci Int Genet.* 2012;6: 398–406.  
661 doi:10.1016/j.fsigen.2011.08.004
- 662 40. Castillo M, Martín-Orúe SM, Manzanilla EG, Badiola I, Martín M, Gasa J. Quantification of total  
663 bacteria, enterobacteria and lactobacilli populations in pig digesta by real-time PCR. *Vet*  
664 *Microbiol.* 2006;114: 165–170. doi:10.1016/j.vetmic.2005.11.055
- 665 41. Klindworth A, Pruesse E, Schweer T, Peplies J, Quast C, Horn M, et al. Evaluation of general 16S  
666 ribosomal RNA gene PCR primers for classical and next-generation sequencing-based diversity  
667 studies. *Nucleic Acids Res.* Oxford University Press; 2013;41: e1. doi:10.1093/nar/gks808
- 668 42. Hugerth LW, Muller EEL, Hu YOO, Lebrun LAM, Roume H, Lundin D, et al. Systematic design  
669 of 18S rRNA gene primers for determining eukaryotic diversity in microbial consortia. *PLoS One.*  
670 2014;9. doi:10.1371/journal.pone.0095567
- 671 43. Martin M. Cutadapt removes adapter sequences from high-throughput sequencing reads kenkyuhi  
672 hojokin gan rinsho kenkyu jigyo. *EMBnet.journal.* 2013;17: 10–12. doi:10.14806/ej.17.1.200
- 673 44. Bolger AM, Lohse M, Usadel B. Trimmomatic: A flexible read trimming tool for Illumina NGS  
674 data. *Bioinformatics.* 2014;btu170.
- 675 45. Schloss PD, Westcott SL, Ryabin T, Hall JR, Hartmann M, Hollister EB, et al. Introducing  
676 mothur: Open-source, platform-independent, community-supported software for describing and  
677 comparing microbial communities. *Appl Environ Microbiol.* 2009;75: 7537–7541.  
678 doi:10.1128/AEM.01541-09
- 679 46. R Core Team. R: A language and environment for statistical computing. Foundation for Statistical  
680 Computing, Vienna, Austria.; 2018.
- 681 47. McMurdie PJ, Holmes S. Phyloseq: a bioconductor package for handling and analysis of high-  
682 throughput phylogenetic sequence data. *Pac Symp Biocomput.* NIH Public Access; 2012; 235–46.  
683 Available: <http://www.ncbi.nlm.nih.gov/pubmed/22174279>
- 684 48. Bradley IM, Pinto AJ, Guest JS. Design and Evaluation of Illumina MiSeq-Compatible, 18S rRNA  
685 Gene-Specific Primers for Improved Characterization of Mixed Phototrophic Communities. *Appl*  
686 *Environ Microbiol.* American Society for Microbiology; 2016;82: 5878–91.  
687 doi:10.1128/AEM.01630-16
- 688 49. Wuertz D, Setz T, Chalabi Y. fBasics: Rmetrics - Markets and Basic Statistics [Internet].  
689 Available: <https://cran.r-project.org/package=fBasics>
- 690 50. Fox J, Weisberg S. An {R} Companion to Applied Regression [Internet]. 2nd Editio. Thousand  
691 Oaks CA: Sage; 2011. Available: <http://socserv.socsci.mcmaster.ca/jfox/Books/Companion>
- 692 51. Lüdecke D. \_sjstats: Statistical Functions for Regression Models [Internet]. 2019.

- 693           doi:10.5281/zenodo.1284472
- 694   52.   Steinberger A. seq-scripts release v. 1.0. 2016. doi:10.5281/zenodo.1458243
- 695   53.   Pedregosa F, Varoquax G, Gramfort A, Michel V, Grisel O, Blondel M, et al. Scikit-learn:  
696   Machine Learning in Python. Matthieu Perrot [Internet]. Journal of Machine Learning Research.  
697   2011. Available: <http://scikit-learn.sourceforge.net>.
- 698   54.   Cobaugh KL, Schaeffer SM, DeBruyn JM. Functional and Structural Succession of Soil Microbial  
699   Communities below Decomposing Human Cadavers. PLoS One. 2015;10: e0130201.  
700   doi:10.1371/journal.pone.0130201
- 701   55.   Adserias-Garriga J, Hernández M, Quijada NM, Lázaro DR, Steadman D, Garcia-Gil J. Daily  
702   thanatomicrobiome changes in soil as an approach of postmortem interval estimation: An  
703   ecological perspective. Forensic Sci Int. 2017;278: 388–395. doi:10.1016/j.forsciint.2017.07.017
- 704   56.   Carter DO, Tibbett M. Taphonomic mycota: fungi with forensic potential. J Forensic Sci. ASTM  
705   International; 2003;48: 168–171. doi:JFS2002169\_481
- 706   57.   Dumack K, Flues S, Hermanns K, Bonkowski M. Rhogostomidae (Cerczoa) from soils, roots and  
707   plant leaves (*Arabidopsis thaliana*): Description of *Rhogostoma epiphylla* sp. nov. and *R.*  
708   *cylindrica* sp. nov. Eur J Protistol. 2017;60: 76–86. doi:10.1016/j.ejop.2017.06.001
- 709   58.   Metcalf JL, Wegener Parfrey L, Gonzalez A, Lauber CL, Knights D, Ackermann G, et al. A  
710   microbial clock provides an accurate estimate of the postmortem interval in a mouse model  
711   system. Elife. 2013;2: e01104. doi:10.7554/eLife.01104
- 712   59.   Keenan SW, Emmons AL, Taylor LS, Phillips G, Mason AR, Mundorff AZ, et al. Spatial impacts  
713   of a multi-individual grave on microbial and microfaunal communities and soil biogeochemistry.  
714   Yang Z, editor. PLoS One. Public Library of Science; 2018;13: e0208845.  
715   doi:10.1371/journal.pone.0208845
- 716   60.   Szelecz I, Sorge F, Seppey CVW, Mulot M, Steel H, Neilson R, et al. Effects of decomposing  
717   cadavers on soil nematode communities over a one-year period. Soil Biol Biochem. 2016;103:  
718   405–416. doi:10.1016/j.soilbio.2016.09.011
- 719   61.   Szelecz I, Losch, Sandra, Seppey, Christophe V.W., Lara, Enrique, Singer, David, Sorge,  
720   Franziska, et al. Comparative analysis of bones, mites, soil chemistry, nematodes and soil micro-  
721   eukaryotes from a suspected homicide to estimate the post-mortem interval. Nat Sci Reports.  
722   2018;8: 1:14.
- 723   62.   Szelecz I, Fournier B, Seppey C, Amendt J, Mitchell E. Can soil testate amoebae be used for  
724   estimating the time since death? A field experiment in a deciduous forest. Forensic Sci Int.  
725   2014;236: 90–98. doi:10.1016/j.forsciint.2013.12.030
- 726   63.   Seppey CVW, Fournier B, Szelecz I, Singer D, Mitchell EAD, Lara E. Response of forest soil  
727   euglyphid testate amoebae (Rhizaria: Cerczoa) to pig cadavers assessed by high-throughput  
728   sequencing. Int J Legal Med. 2016;130: 551–562. doi:10.1007/s00414-015-1149-7
- 729   64.   Theodorakopoulos N, Bachar D, Christen R, Alain K, Chapon V. Exploration of *Deinococcus*-

- 730 Thermus molecular diversity by novel group-specific PCR primers. *Microbiologyopen*. 2013;2:  
731 862–872. doi:10.1002/mbo3.1119
- 732 65. Wilson-Taylor RJ, Dautartas AM. Time Since Death Estimation and Bone Weathering. In:  
733 Langley NR, Tersigni-Tarrant MA, editors. *Forensic Anthropology A Comprehensive*  
734 *Introduction*. second edi. 2017.
- 735 66. Fierer N, Hamady M, Lauber CL, Knight R. The influence of sex, handedness, and washing on the  
736 diversity of hand surface bacteria. *Proc Natl Acad Sci. National Academy of Sciences*; 2008;105:  
737 17994–17999. doi:10.1073/PNAS.0807920105
- 738 67. De Filippo C, Cavalieri D, Di Paola M, Ramazzotti M, Poullet JB, Massart S, et al. Impact of diet  
739 in shaping gut microbiota revealed by a comparative study in children from Europe and rural  
740 Africa. *Proc Natl Acad Sci U S A. National Academy of Sciences*; 2010;107: 14691–6.  
741 doi:10.1073/pnas.1005963107
- 742 68. HMP Consortium THMP, Huttenhower C, Gevers D, Knight R, Abubucker S, Badger JH, et al.  
743 Structure, function and diversity of the healthy human microbiome. *Nature. Nature Publishing*  
744 *Group*; 2012;486: 207–214. doi:10.1038/nature11234
- 745 69. Larsen N, Vogensen FK, van den Berg FWJ, Nielsen DS, Andreasen AS, Pedersen BK, et al. Gut  
746 Microbiota in Human Adults with Type 2 Diabetes Differs from Non-Diabetic Adults. Bereswill  
747 S, editor. *PLoS One. Public Library of Science*; 2010;5: e9085. doi:10.1371/journal.pone.0009085
- 748 70. Pechal JL, Schmidt CJ, Jordan HR, Benbow ME. A large-scale survey of the postmortem human  
749 microbiome, and its potential to provide insight into the living health condition. *Nat Sci Reports*.  
750 2018;8. doi:10.1038/s41598-018-23989-w
- 751 71. Caporaso JG, Lauber CL, Costello EK, Berg-Lyons D, Gonzalez A, Stombaugh J, et al. Moving  
752 pictures of the human microbiome. *Genome Biol. BioMed Central*; 2011;12: R50. doi:10.1186/gb-  
753 2011-12-5-r50
- 754 72. Costello EEK, Lauber CCL, Hamady M, Fierer N, Gordon JI, Knight R. Bacterial community  
755 variation in human body habitats across space and time. *Science (80- )*. 2009;326: 1694–7.  
756 doi:10.1126/science.1177486.Bacterial
- 757 73. Fierer N, Lauber CL, Zhou N, McDonald D, Costello EK, Knight R. Forensic identification using  
758 skin bacterial communities. *Proc Natl Acad Sci U S A*. 2010;107: 6477–6481.  
759 doi:10.1073/pnas.1000162107
- 760 74. Lax S, Hampton-Marcell JT, Gibbons SM, Colares GB, Smith D, Eisen JA, et al. Forensic analysis  
761 of the microbiome of phones and shoes. *Microbiome. BioMed Central*; 2015;3: 21.  
762 doi:10.1186/s40168-015-0082-9
- 763 75. Nicholson RA. Bone Degradation, Burial Medium and Species Representation: Debunking the  
764 Myths, an Experiment-based Approach [Internet]. *Journal of Archaeological Science*; 1996;  
765 23:513-533.
- 766 76. Metcalf JL, Xu ZZ, Weiss S, Lax S, Treuren W Van, Hyde ER, et al. Microbial community  
767 assembly and metabolic function during mammalian corpse decomposition. *Science (80- )*.

- 768 2016;351: 158–162. doi:10.1126/science.aad2646
- 769 77. Ghannoum MA, Jurevic RJ, Mukherjee PK, Cui F, Sikaroodi M, Naqvi A, et al. Characterization  
770 of the Oral Fungal Microbiome (Mycobiome) in Healthy Individuals. May RC, editor. PLoS  
771 Pathog. Public Library of Science; 2010;6: e1000713. doi:10.1371/journal.ppat.1000713
- 772 78. Nielsen-Marsh CM, Hedges REM. Patterns of Diagenesis in Bone I: The Effects of Site  
773 Environments. J Archaeol Sci. 2000;27: 1139–1150. doi:10.1006/jasc.1999.0537
- 774 79. Trueman CN, Martill DM. The long-term survival of bone: the role of bioerosion. Archaeometry.  
775 Wiley/Blackwell (10.1111); 2002;44: 371–382. doi:10.1111/1475-4754.t01-1-00070
- 776 80. Hollund HI, Teasdale MD, Mattiangeli V, Sverrisdóttir OÓ, Bradley DG, O’connor T. Pick the  
777 Right Pocket. Sub-sampling of Bone Sections to Investigate Diagenesis and DNA Preservation. Int  
778 J Osteoarchaeol. 2017;27: 365–374. doi:10.1002/oa.2544

779

## 780 Supporting Information

781

782 **S1 Table. Donor Information for the three individuals placed at ARF 2009.**

783

784 **S2 Table. Bones sampled from each of the three individuals (Mundorff and Davoren 2014).**

785

786 **S1 Fig. 16S rRNA targeted metagenomics read distribution.** The minimum library size was 48,288  
787 reads, while the mean library size was 92,334.6 reads; the maximum library was 150,228 reads.

788

789 **S2 Fig. 18S rRNA targeted metagenomics read distribution.** The minimum library size was 5,368  
790 reads; the mean library size was 19,853 reads, and the maximum library size was 40,977 reads.

791

792 **S3 Fig. Bacterial alpha diversity (Inverse Simpson) and richness (observed) by individual.**

793 **\*\*Indicate significance below an alpha value of 0.01. No significance is denoted by “ns”.**

794

795 **S3 Table. Bacterial alpha diversity metrics including observed richness and diversity (Inverse**  
796 **Simpson).** Data was separated by individual, and the mean and standard deviation was computed by body  
797 region. Significance levels are represented by asterisks (\*p < 0.05; \*\*p < 0.01); multiple comparison tests  
798 by individual were only conducted using Inverse Simpson indices. Lower case letters in parenthesis refer  
799 to body regions. A body region with an exponent corresponding to another body region indicates that  
800 those two regions have significantly different diversity indices.

801 **S4 Fig. Inverse Simpson (diversity) calculated from the bacterial dataset. Individuals (“A”, “B”,**  
802 **and “C”) were assessed independently**

803

804 **S5 Fig. Richness (observed) calculated from the bacterial dataset; individuals were combined**

805

806 **S6 Fig. SIMPER results by individual (A: n=53, B: n=55, C: n=54).** Results include only those OTUs  
807 that demonstrated a significant difference by individual following SIMPER. All OTUs of a given genus  
808 are not represented here. The x-axis contains information on the taxonomic identification of these OTUs  
809 at the family level.

810

811 **S7 Fig. Random forest regression.** (A) Bacterial OTUs important for predicting human DNA  
812 concentrations. Importance, as a value between zero to one, is represented in color. Human DNA  
813 concentrations greater than 400 ng gbp<sup>-1</sup> are labeled by body region. Abundance refers to relative  
814 abundance by bone sample, represented by values zero to one. (B) Model accuracy as a function of test  
815 values versus predicted values. The solid red line represents the modeled data; the dotted line represents  
816 an expected model if 100% accuracy.

817

818 **S8 Fig. Relative abundance of the unclassified Saccharomycetales OTU plotted against human DNA**  
819 **concentration.** The label “B” refers to individual B.

820

821 **S9 Fig. Changes in temperature and precipitation for the duration of deposition of each donor.**  
822 Donors are labeled “A”, “B”, “C”, and “ADD” refers to accumulated degree days, an indicator of both  
823 time and temperature. Data obtained from NOAA (<https://www.noaa.gov/>).

824

825 **S10 Fig. Phylum-level bacterial community membership in human rib samples.** Relative abundance  
826 was averaged by bone type, combining results from three individuals (n = 3). Only taxa with average  
827 relative abundances greater than 1% are shown.

828

829 **S11 Fig. Bacterial community phylum-level contributions visualized by individual (“A”, “B”, and**  
830 **“C”) and body region (arm, foot, hand, leg, lower trunk, skull, tooth, upper trunk).** Only relative  
831 abundances greater than 1% are displayed.

832

833

834

835

836

837

838

839

840

841

842

843

844

845  
846  
847  
848  
849  
850  
851  
852  
853

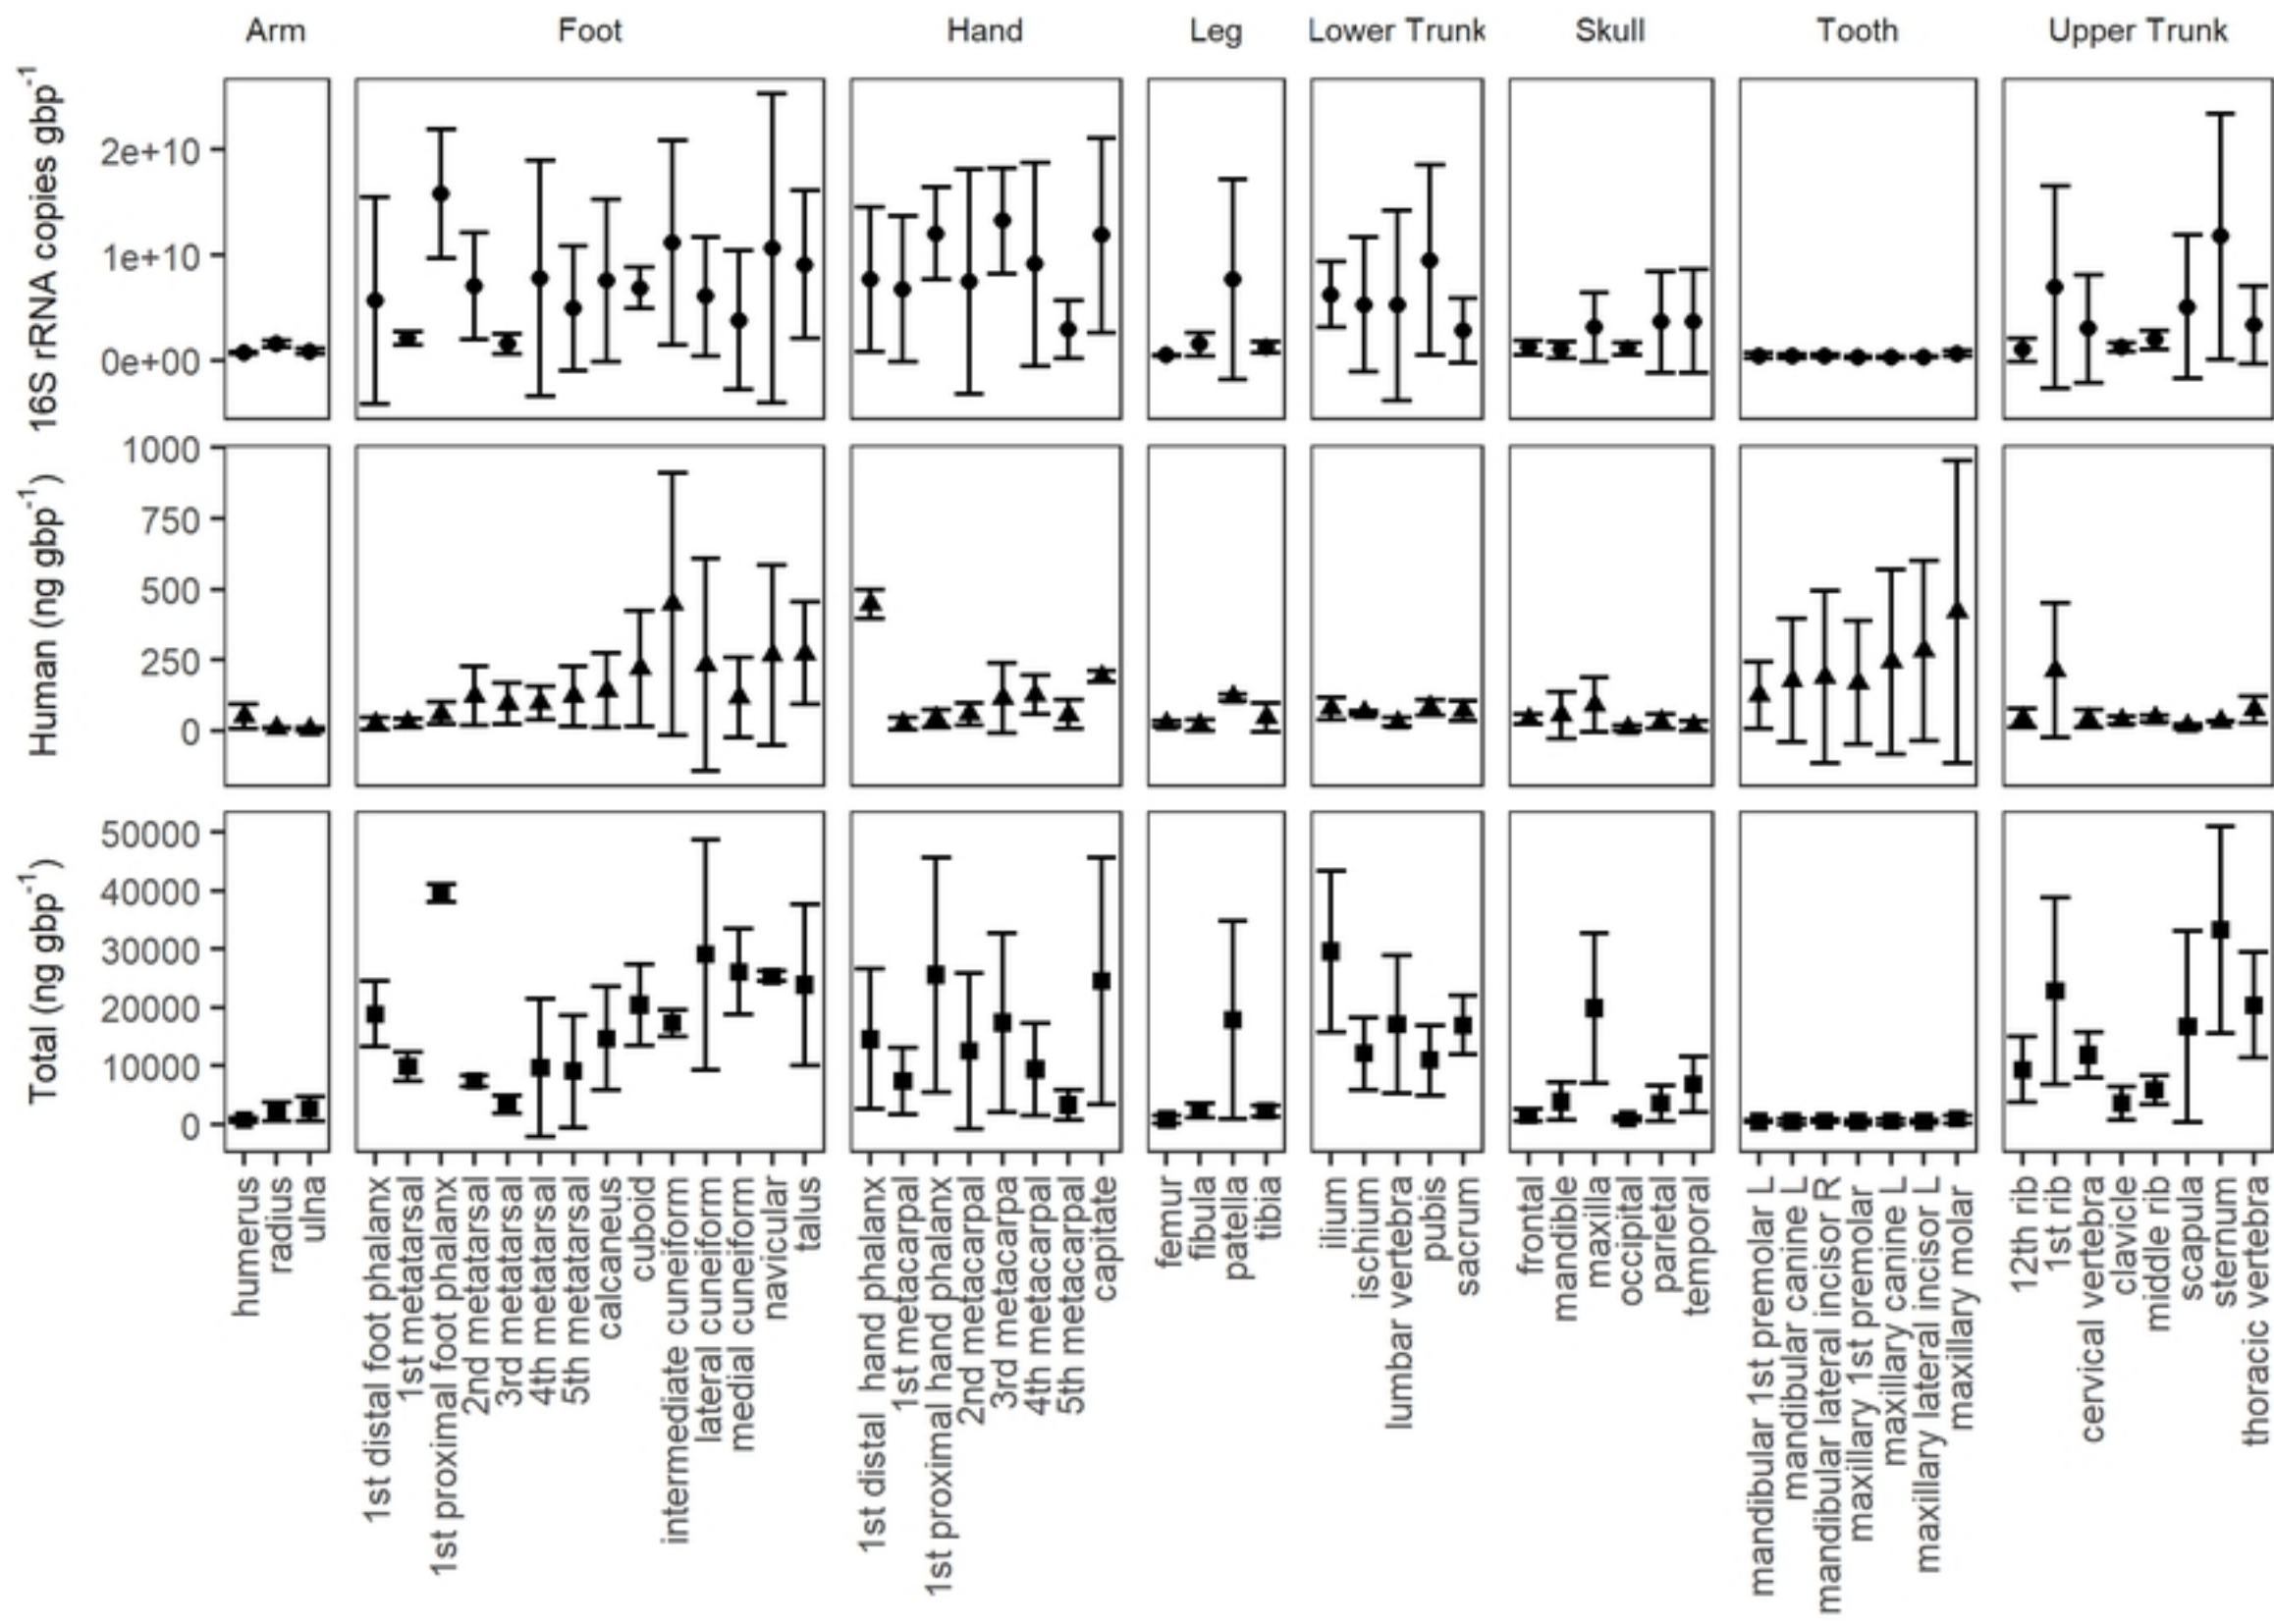

Figure 1

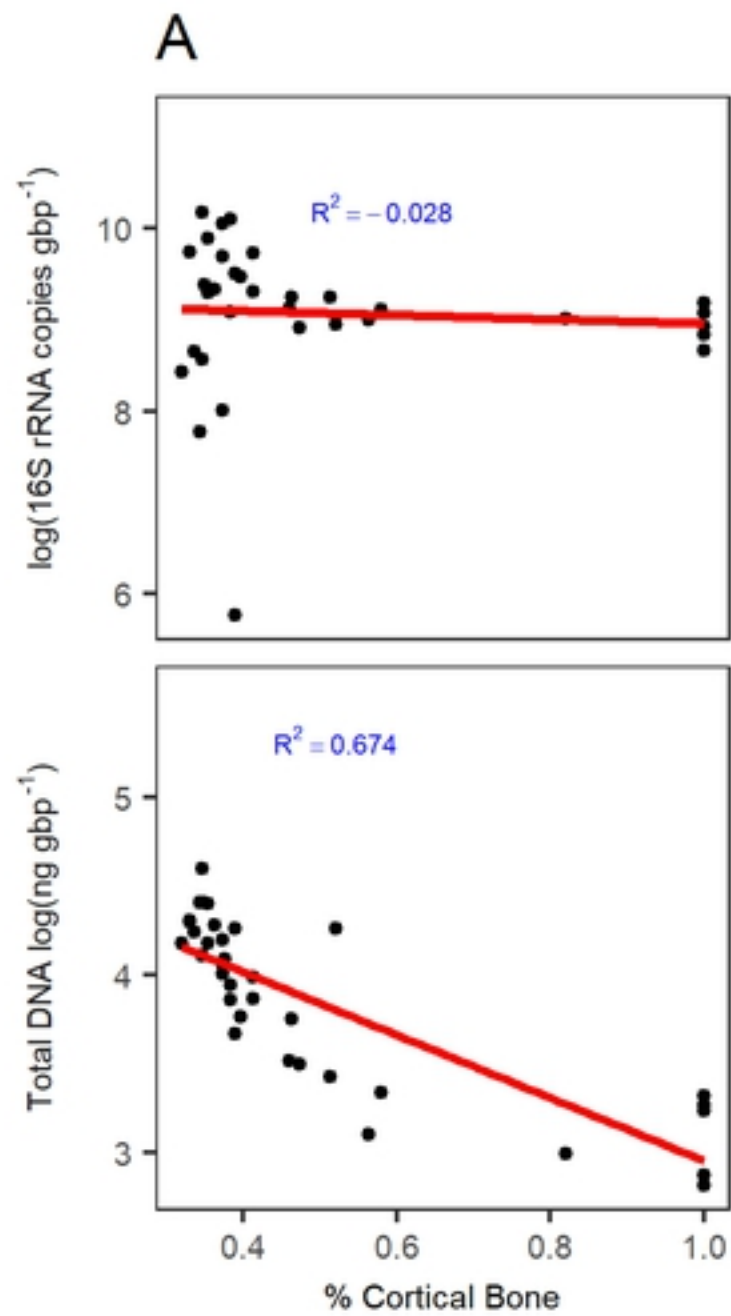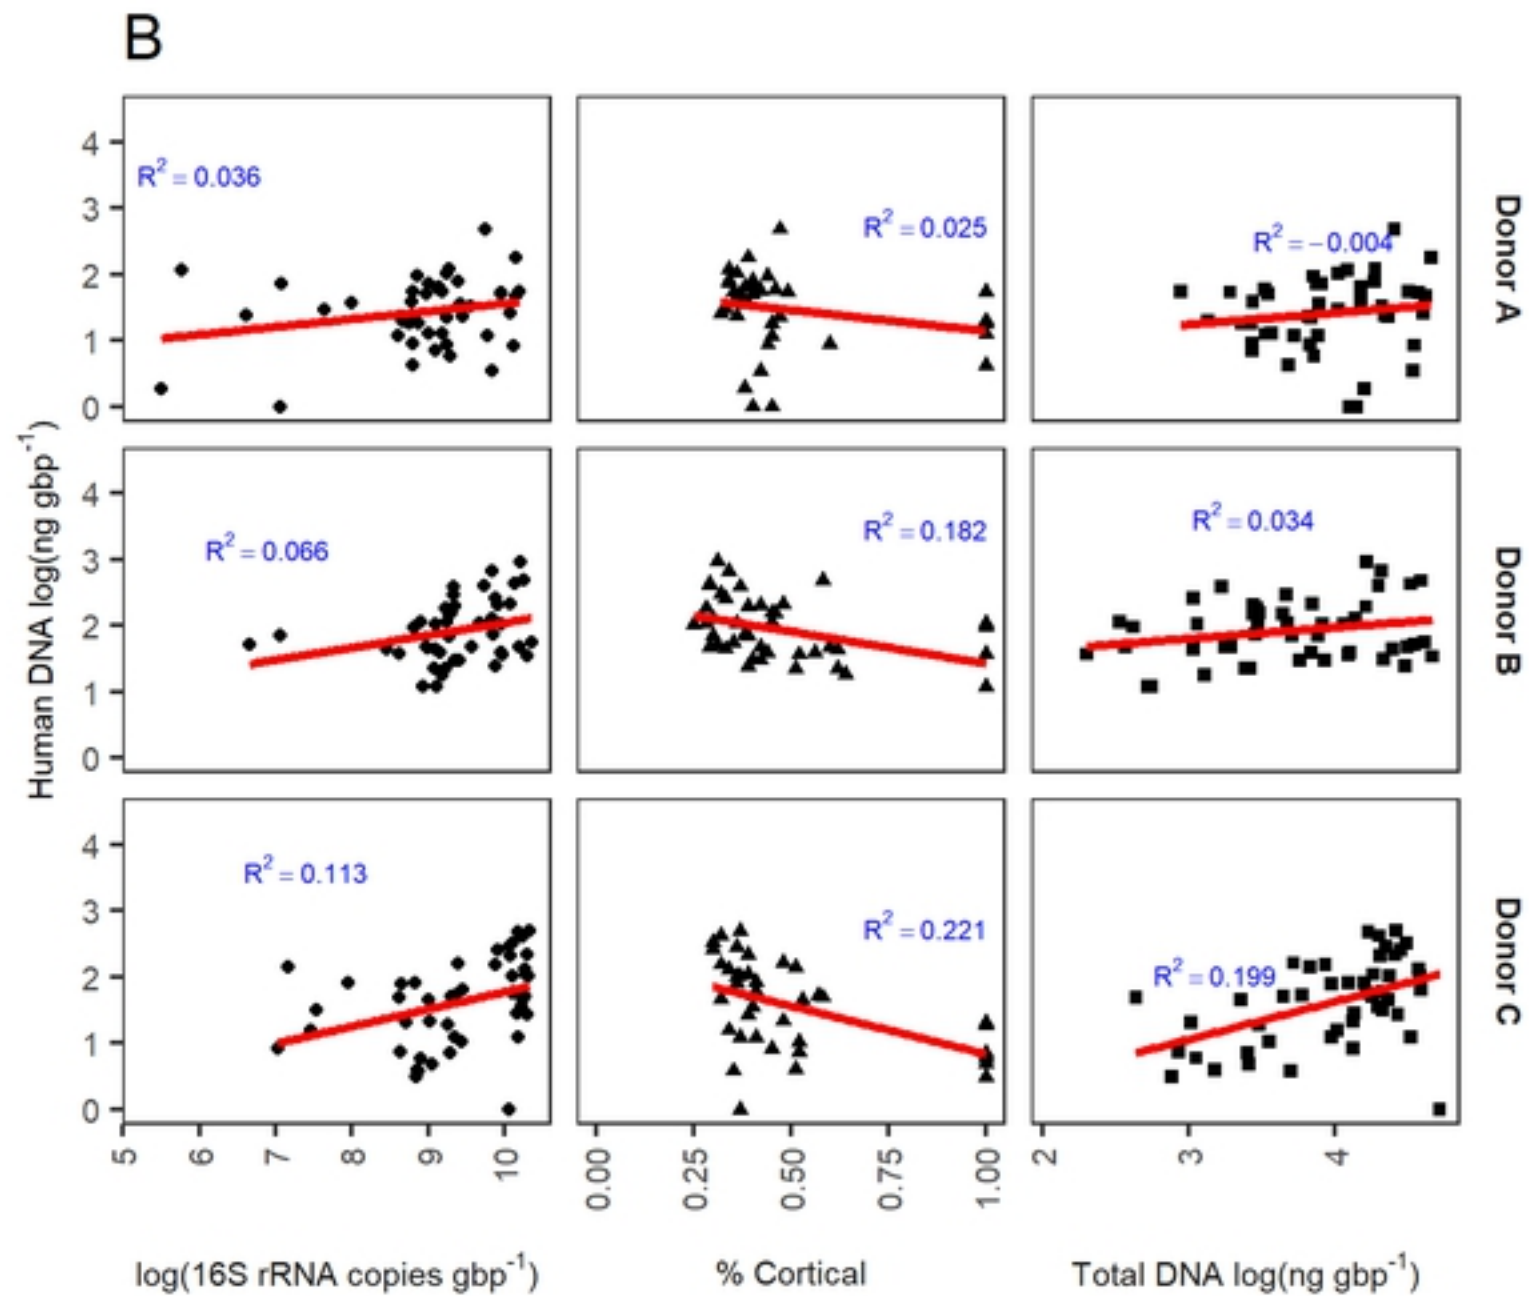

Figure 2



Average Relative Abundance (Phylum > 2%)

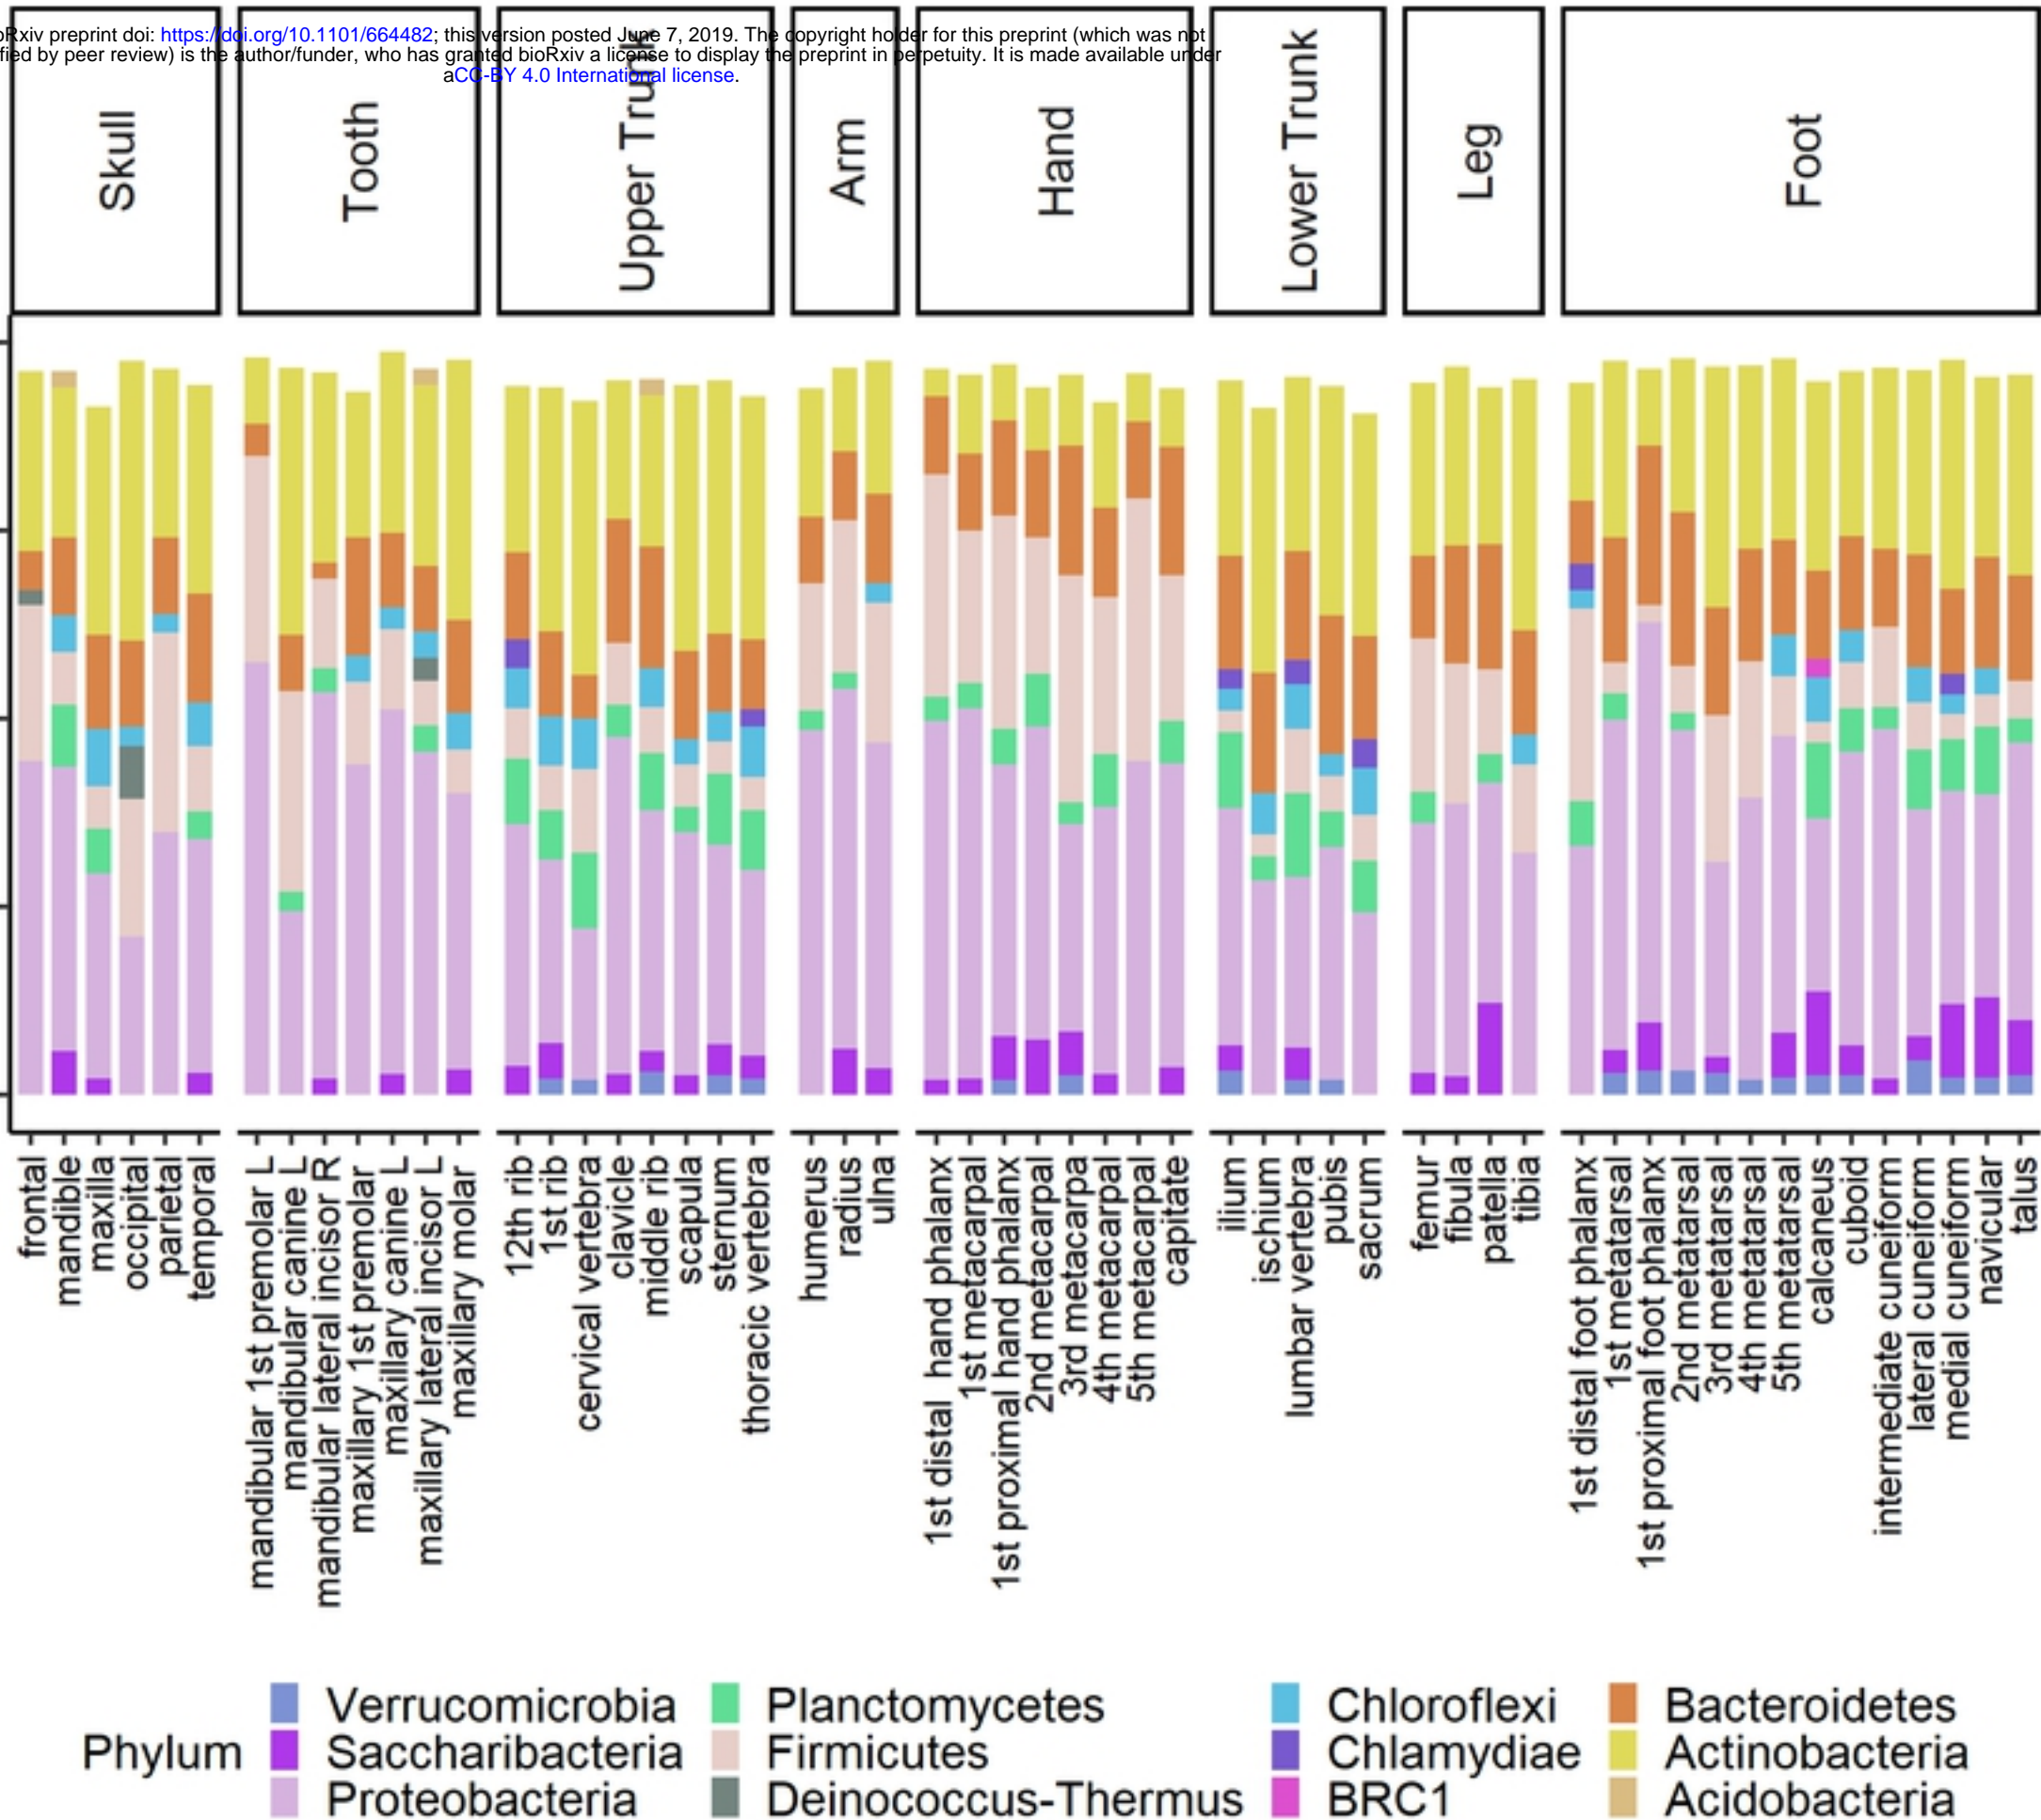

Figure 3

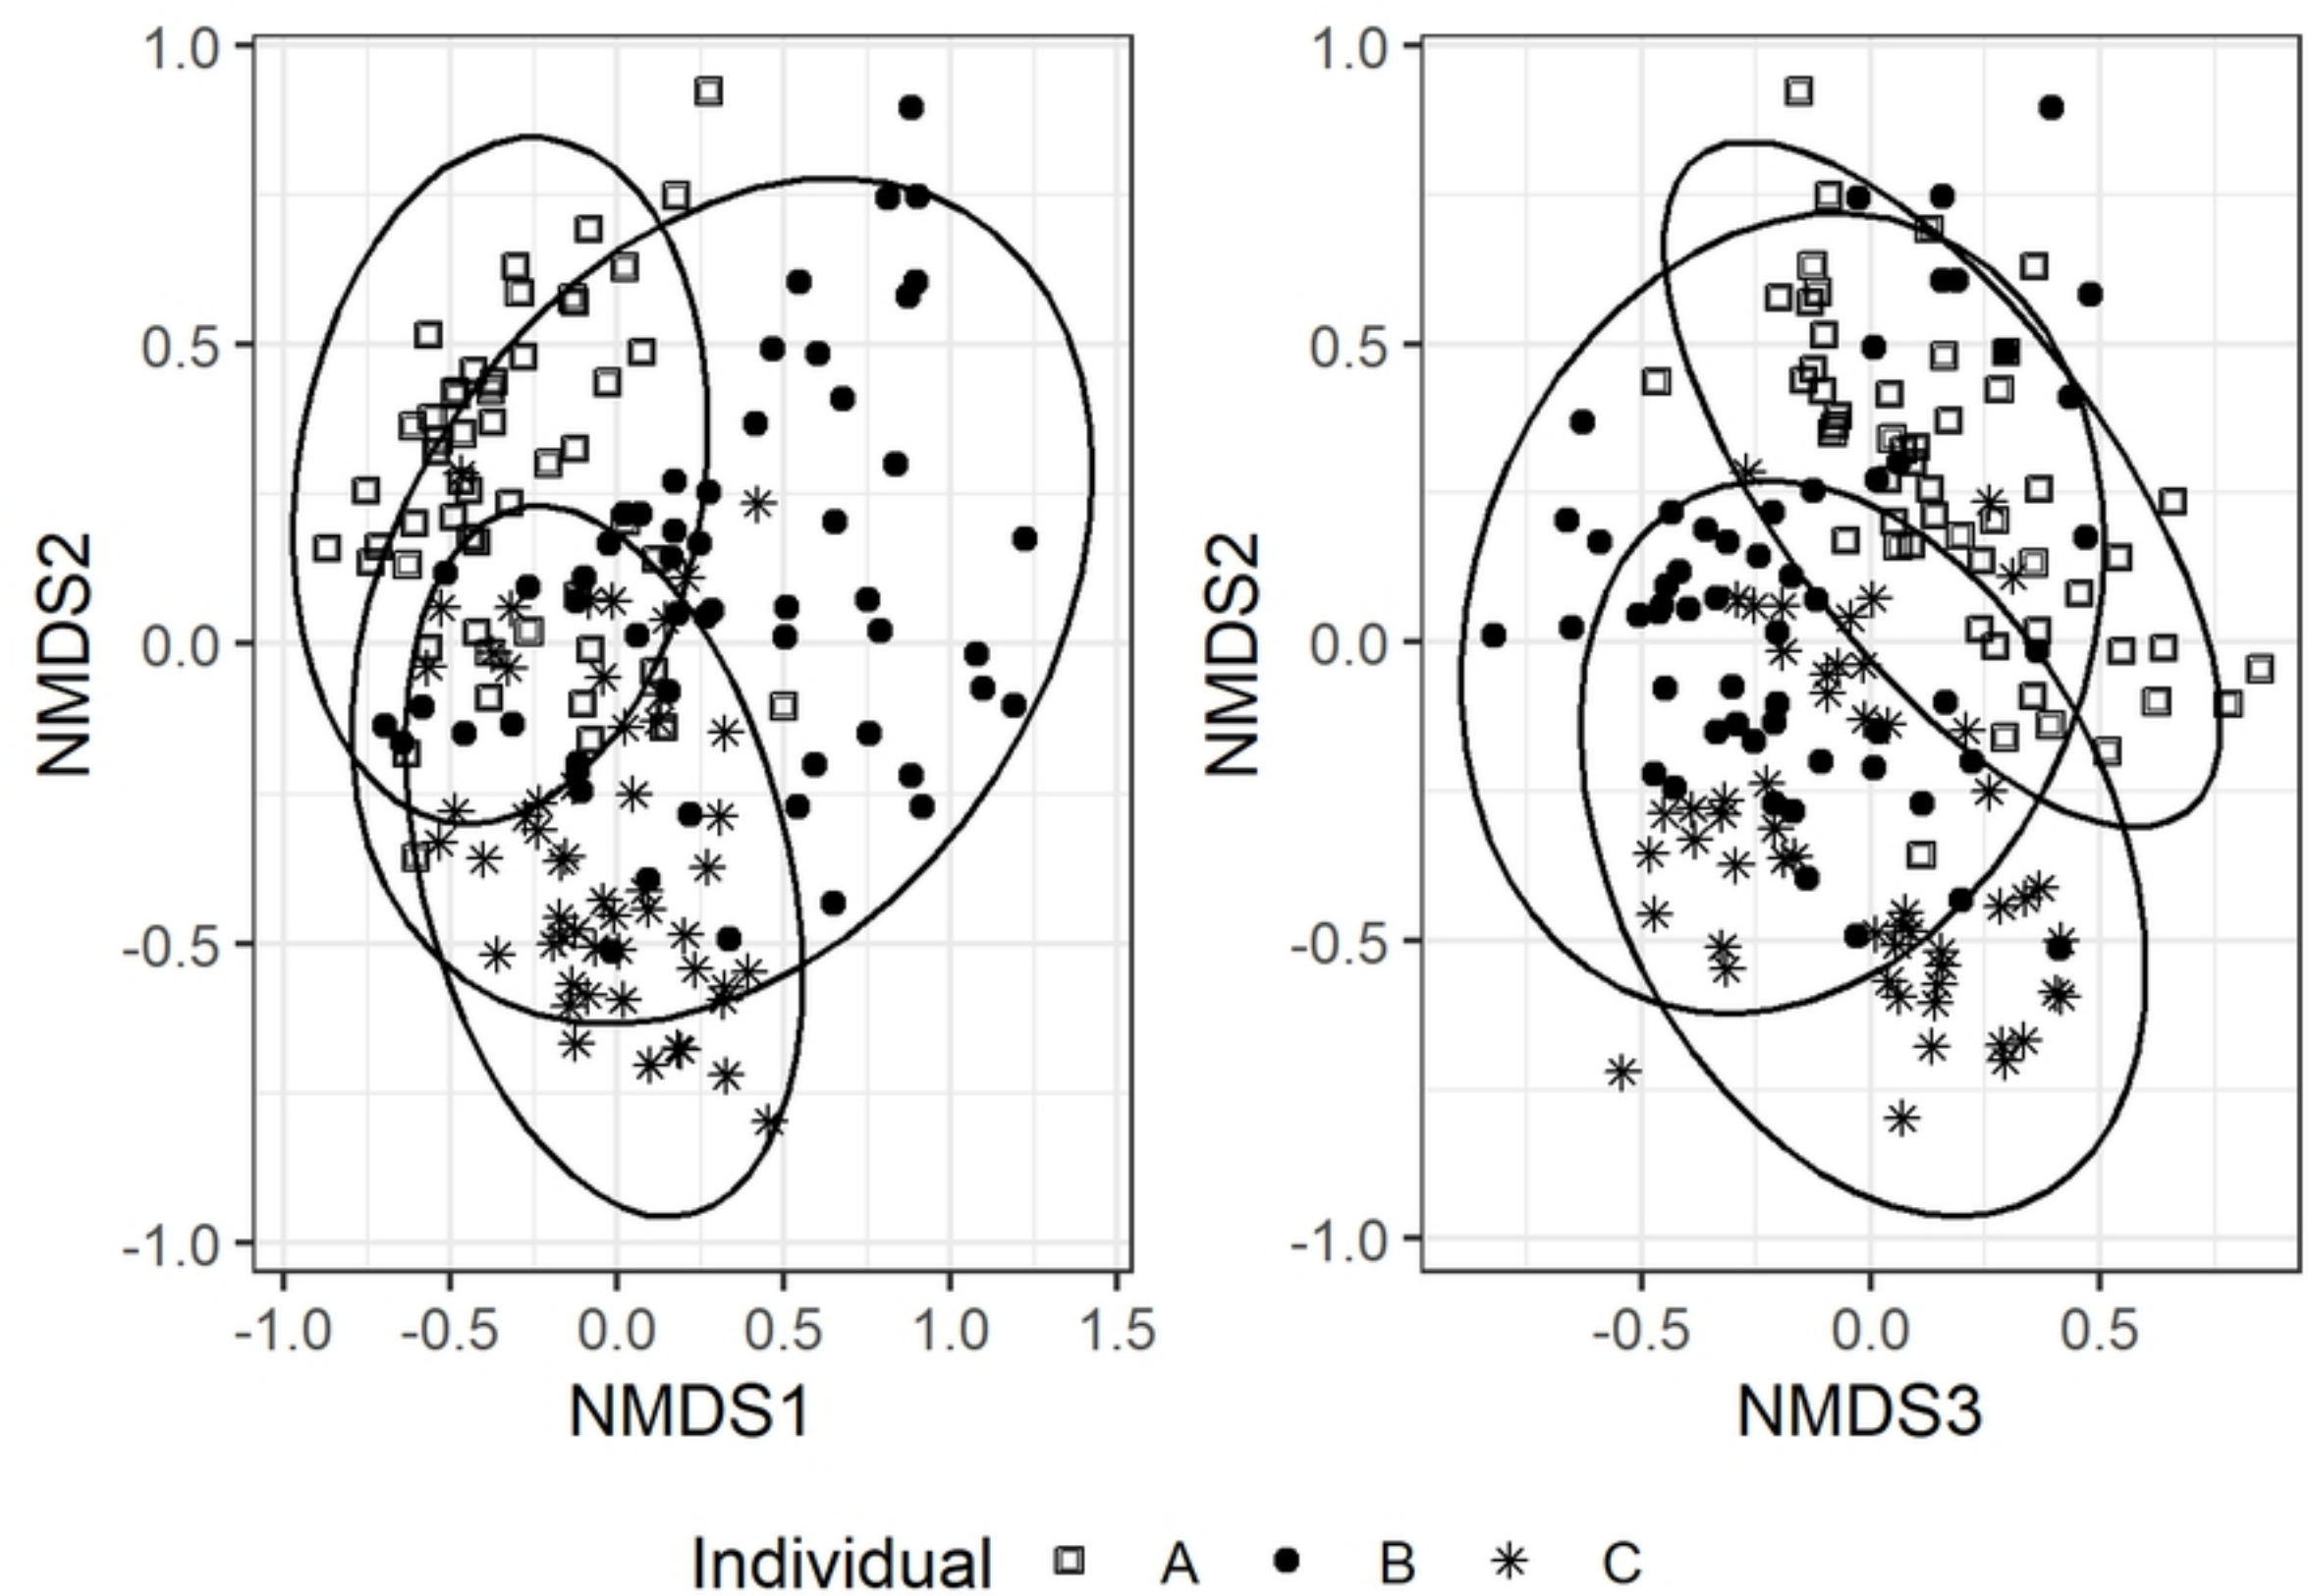

Figure 4

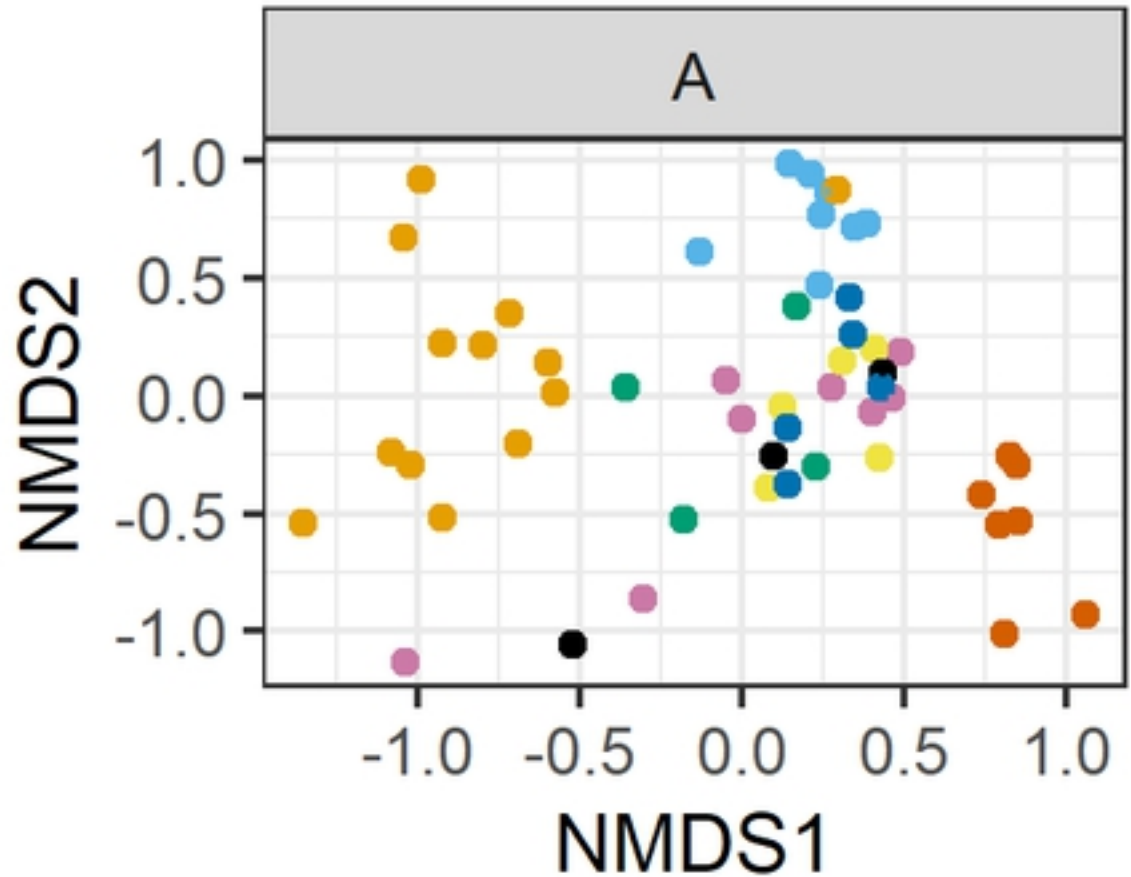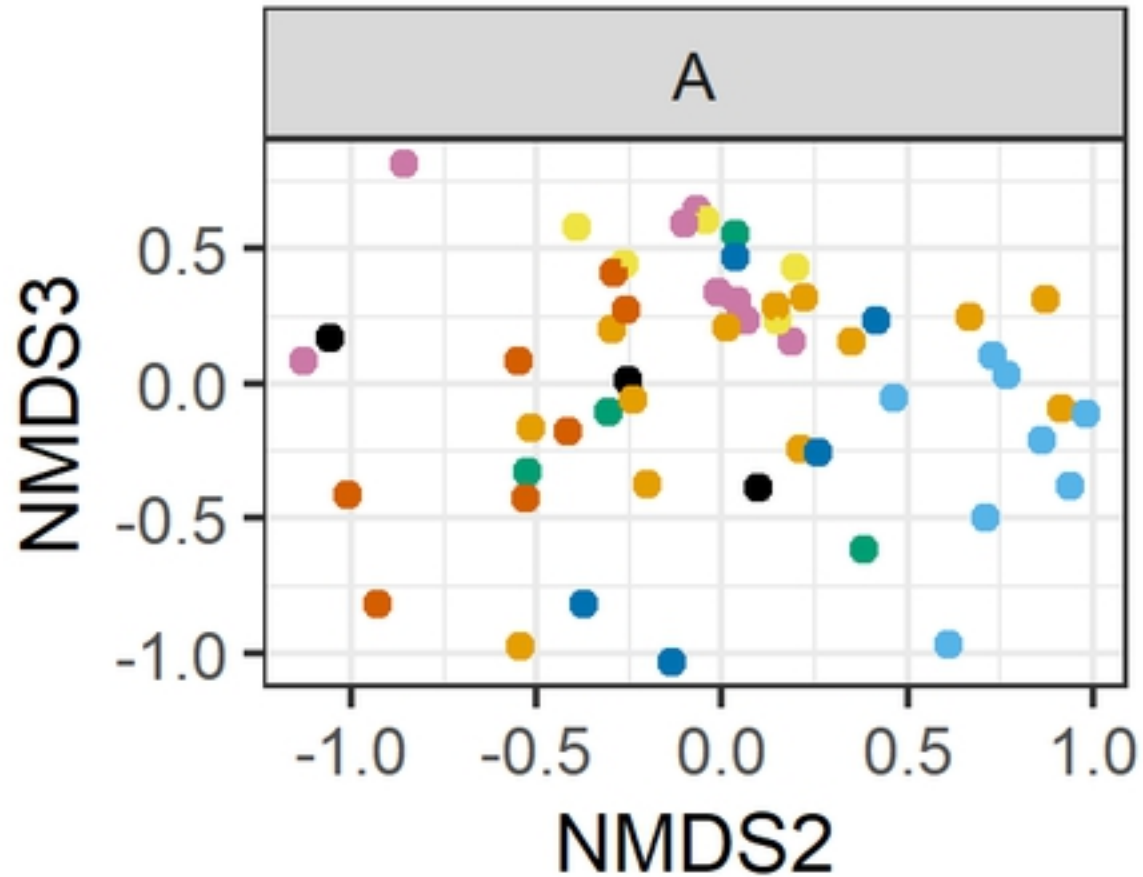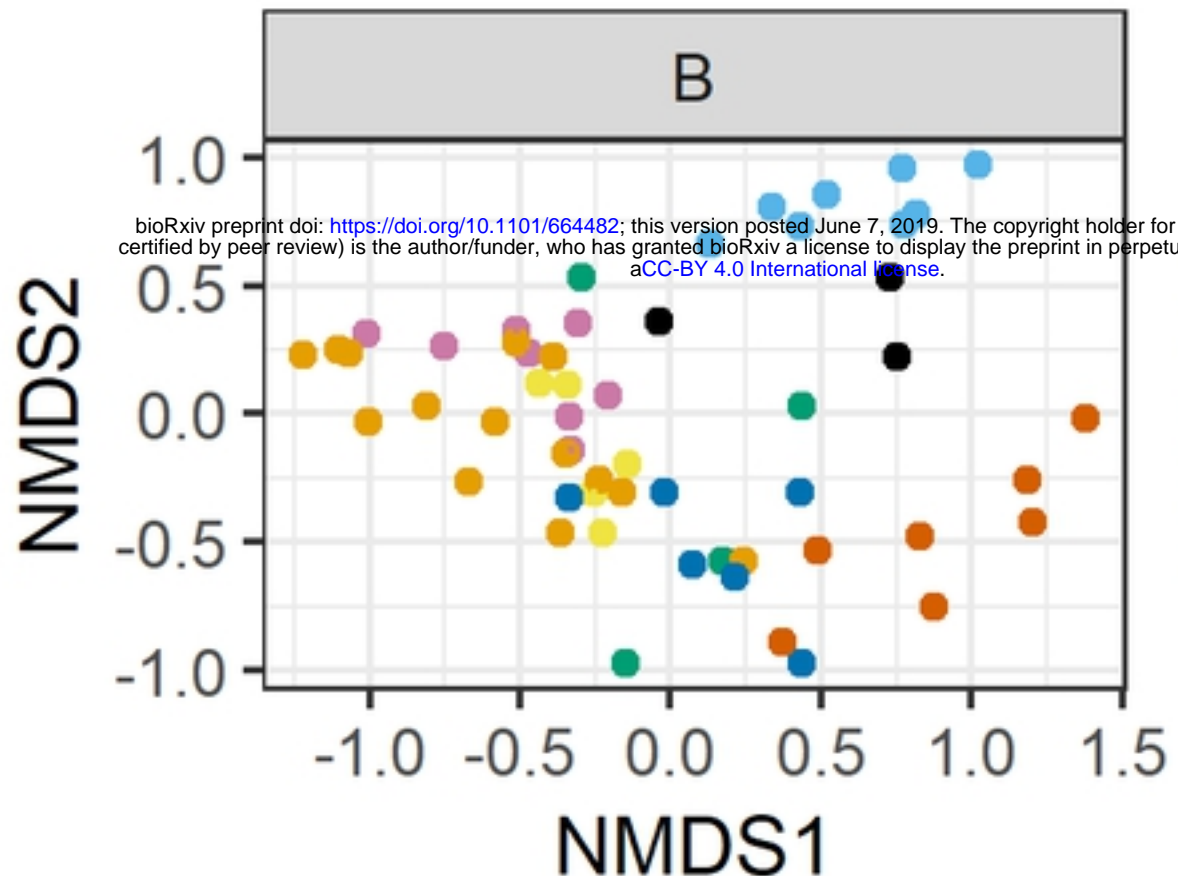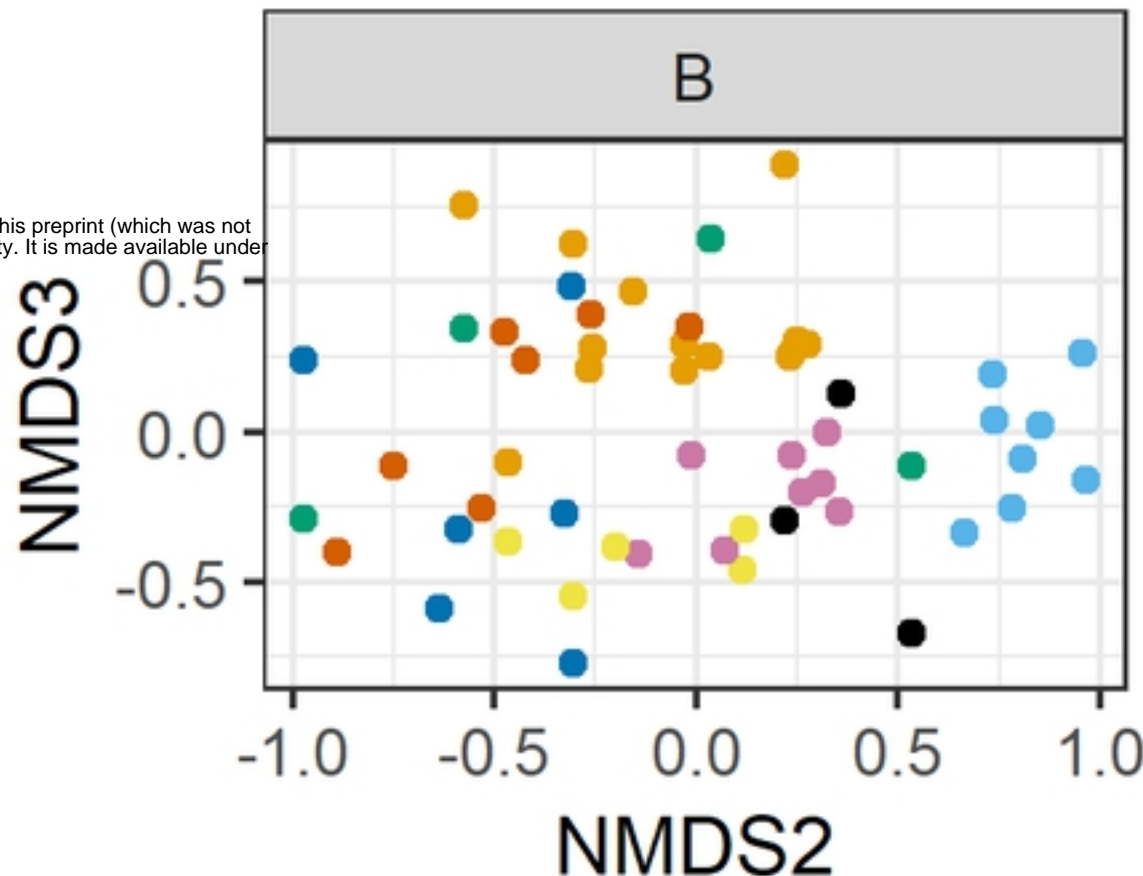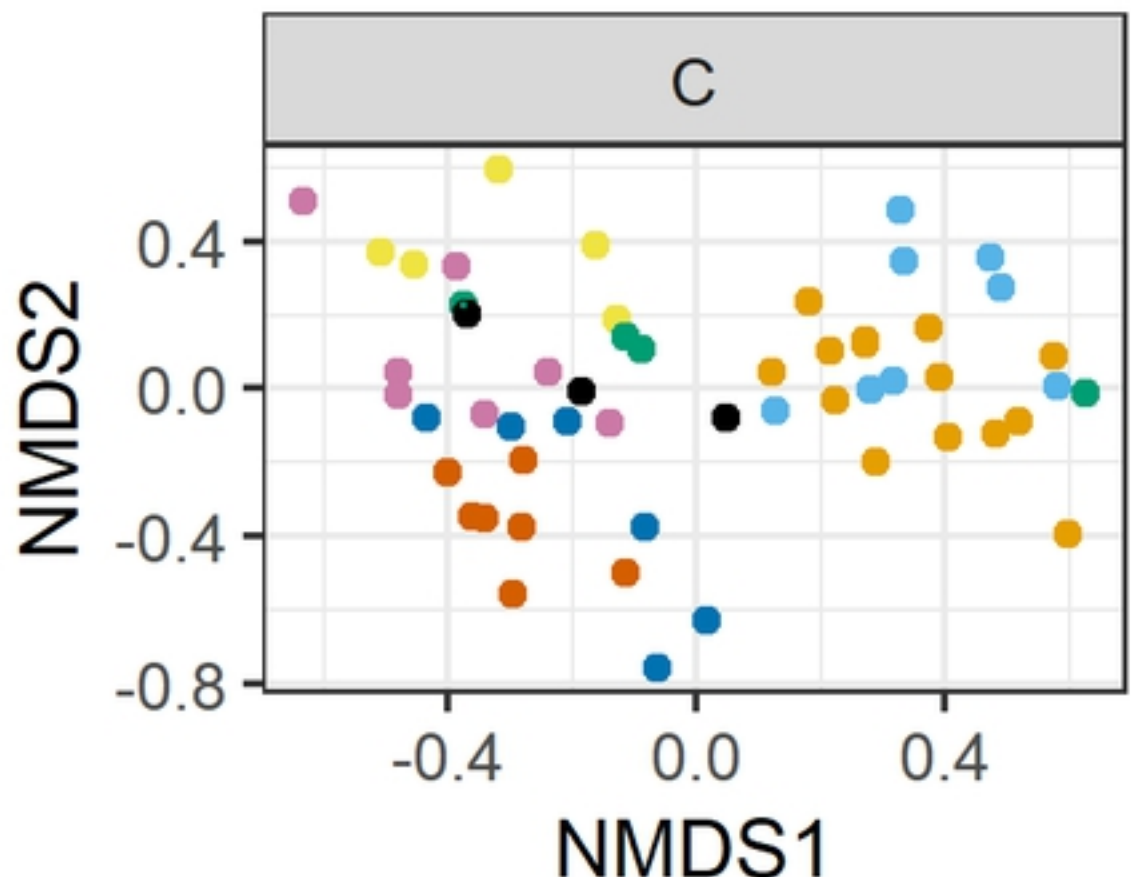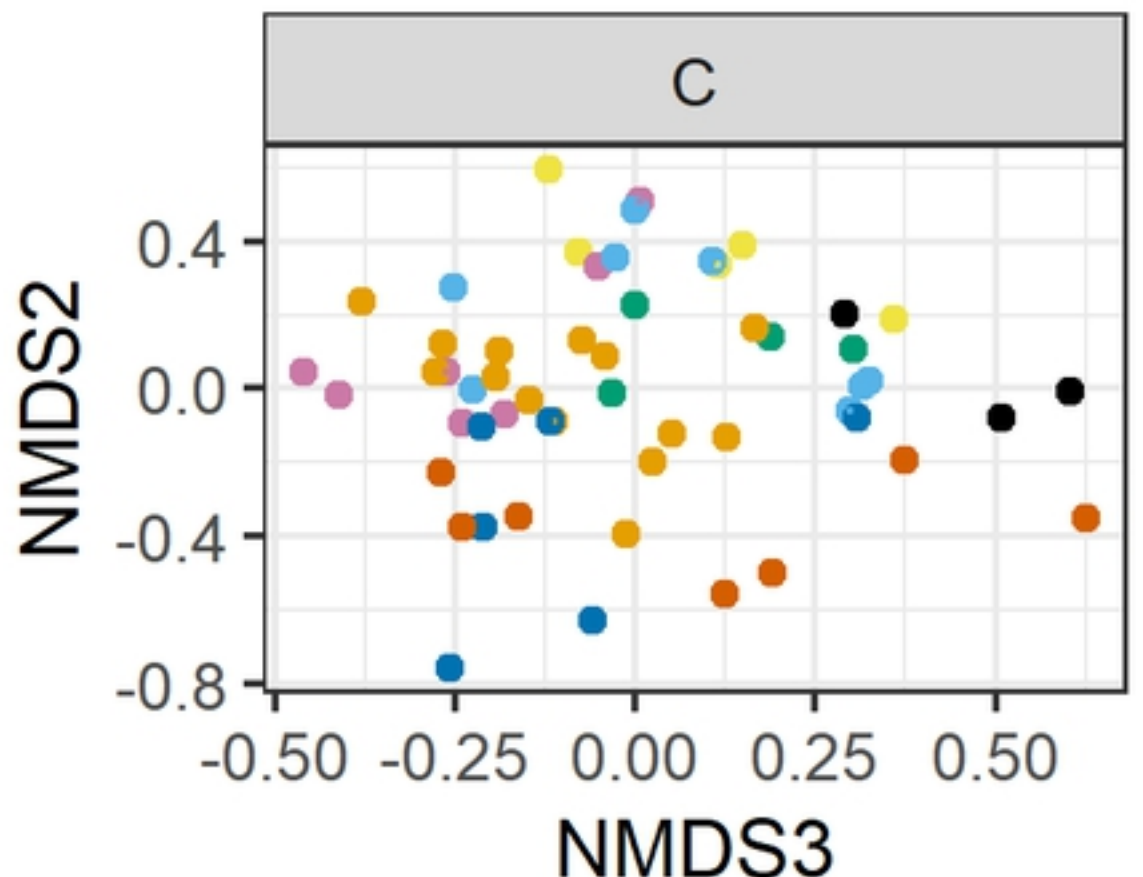

Body Region

|        |        |               |               |
|--------|--------|---------------|---------------|
| ● arm  | ● hand | ● lower trunk | ● tooth       |
| ● foot | ● leg  | ● skull       | ● upper trunk |

Figure 5

bioRxiv preprint doi: <https://doi.org/10.1101/664482>; this version posted June 7, 2019. The copyright holder for this preprint (which was not certified by peer review) is the author/funder, who has granted bioRxiv a license to display the preprint in perpetuity. It is made available under aCC-BY 4.0 International license.

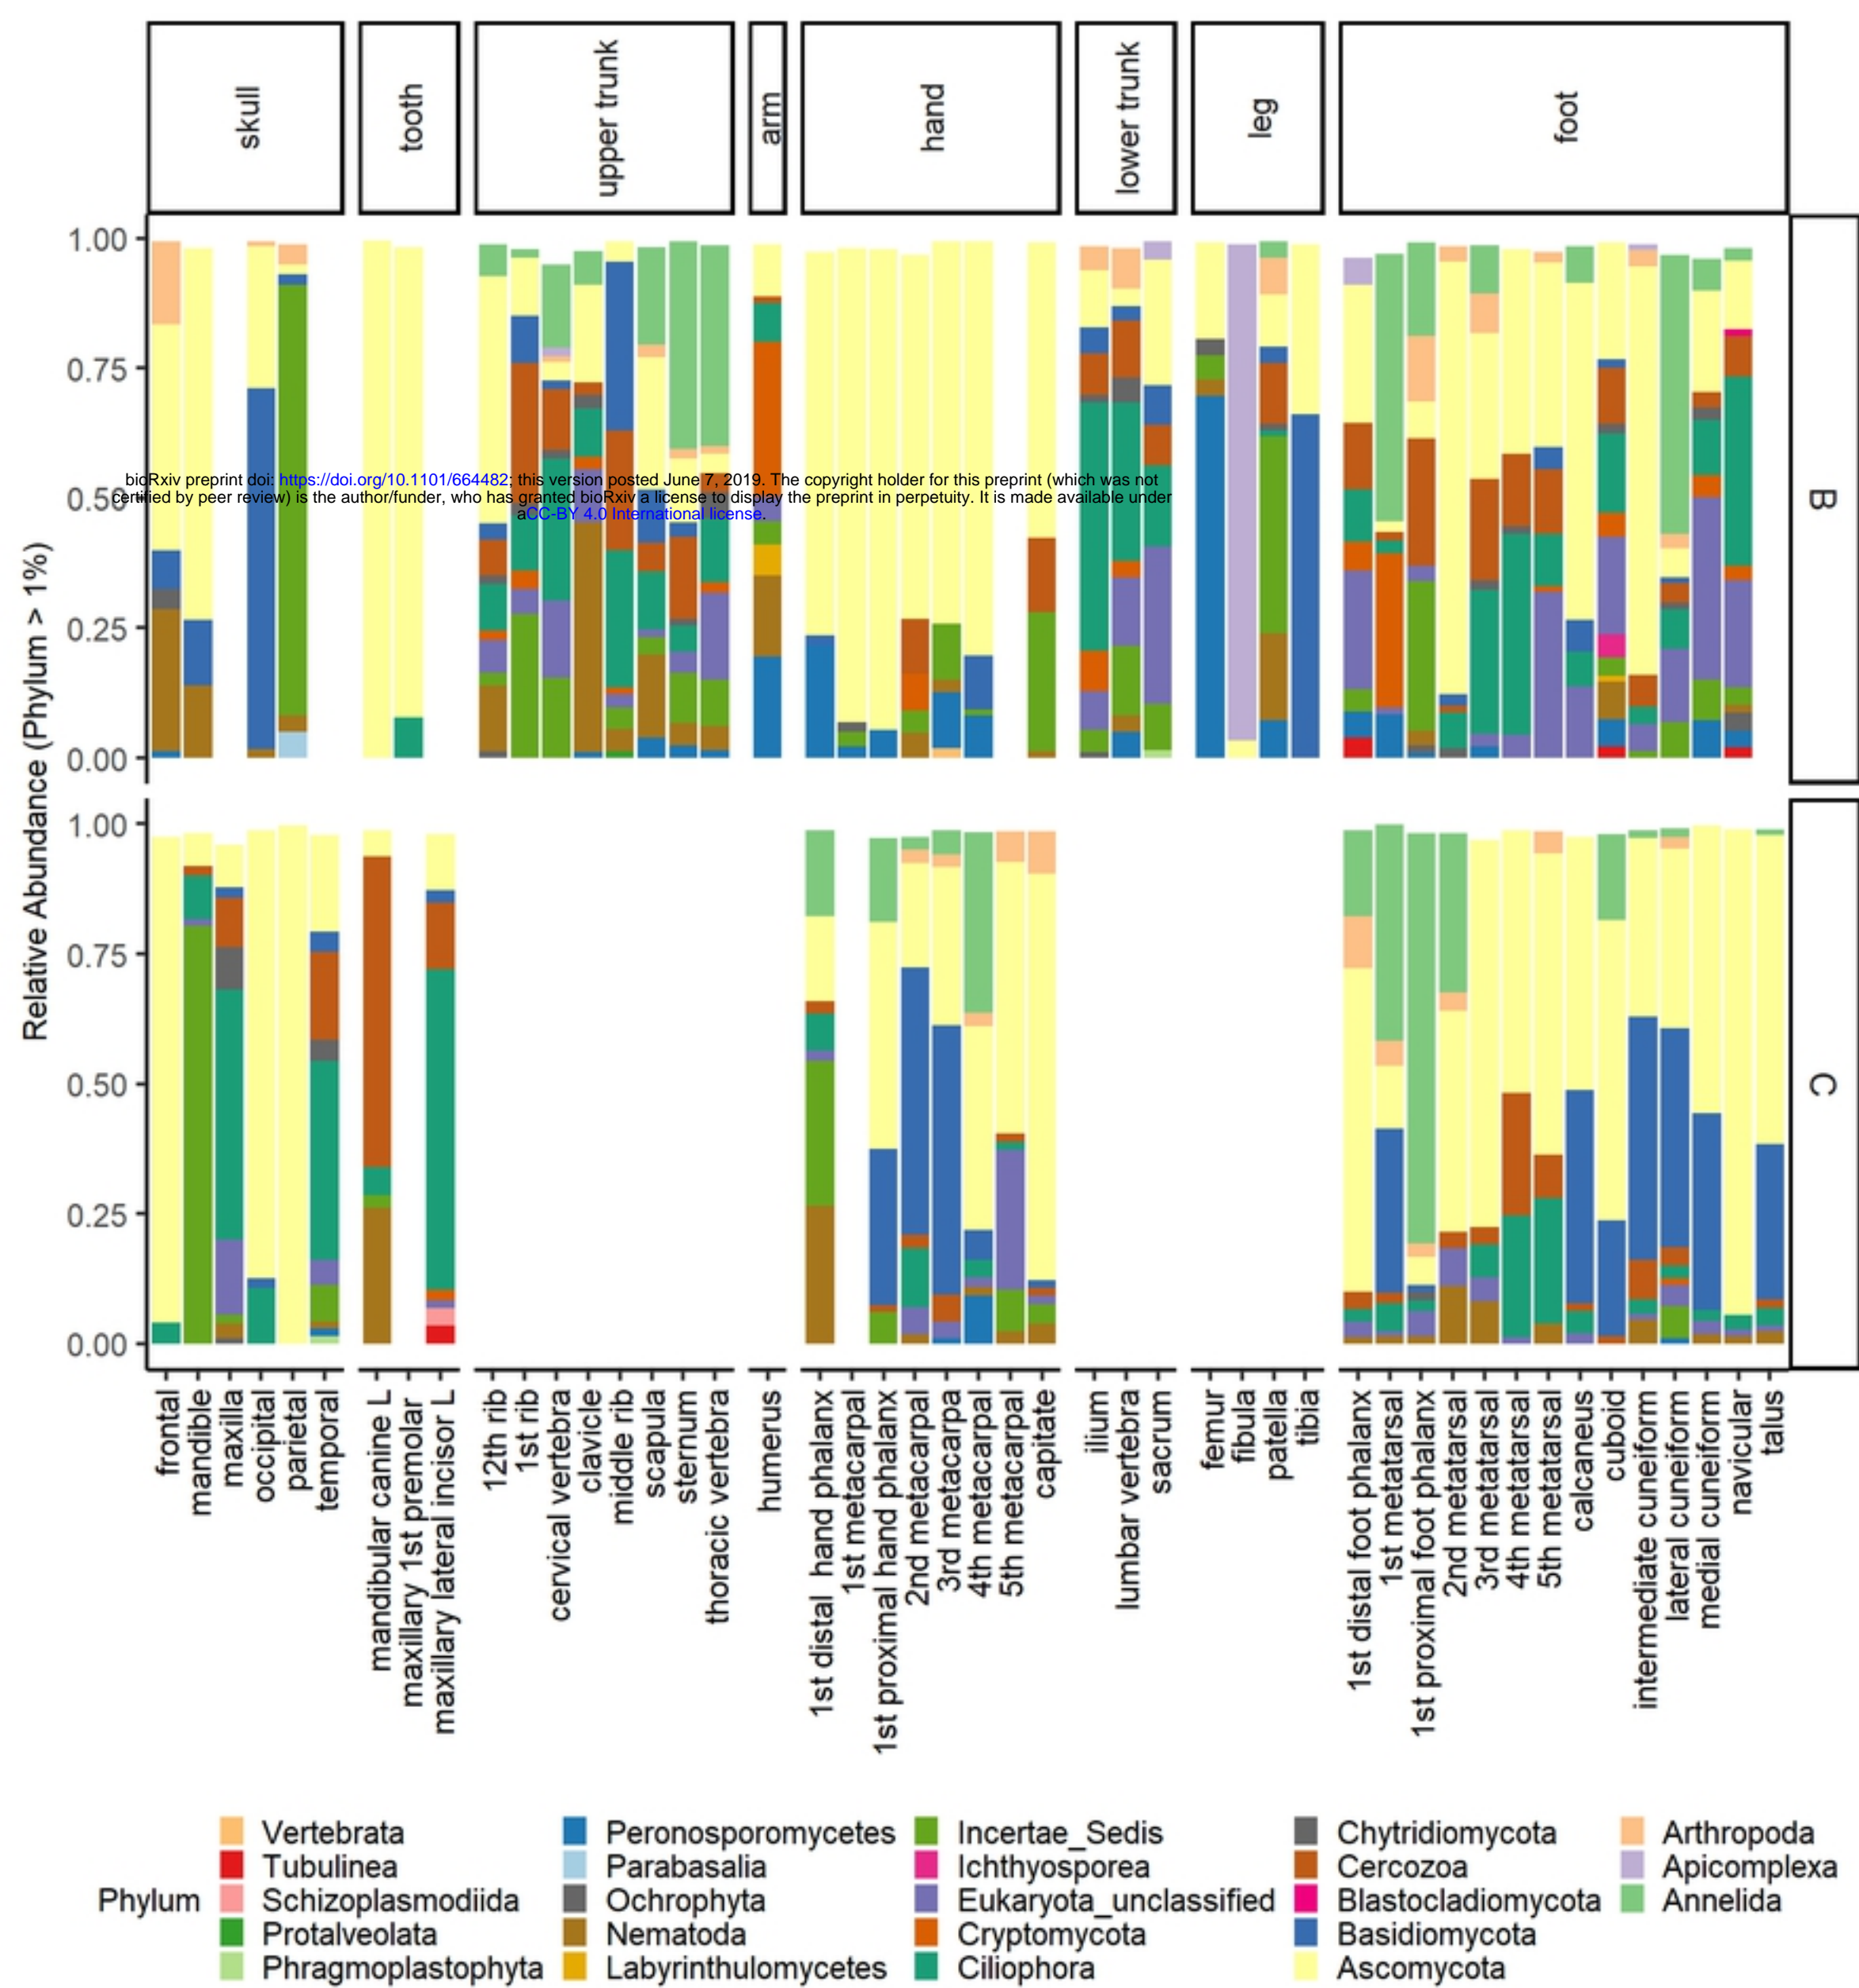

Figure 6
